# Supplementary material for: Next-generation sequencing analysis of circulating micro-RNA expression in response to parabolic flight as a spaceflight analogue
Source: PubMed Central journal article supplement (PMC7606465; doi:10.1038/s41526-020-00121-9), 2020-11-02
Supplement: 41526_2020_121_MOESM1_ESM.pdf [file 41526_2020_121_MOESM1_ESM.pdf]

### **Supplement Figure/Table Legends:**

Supplement Figure 1: Hemolysis quality control. a) RNA and cDNA spike-in controls were used to determine the robustness (RNA extraction efficiency and enzyme inhibition) of RT-qPCR analysis. b) Hemolysis miRNA ratio calculated as CqmiR-23a-3p – CqmiR-451a. c) Absorbance at 414nm (OD414). d) Distribution of hemolysis miRNA ratio, hemolysis OD414, miR-23a-3p and miR-451a across the three experimental groups.

Supplement Figure 2: RNA recovery and quality control of NGS libraries. a) Confirmation of RNA recovery from serum samples based on RNA spike-in levels. b) Quality control of NGS library pool before (left) and after size selection of microRNA inserts (right)

Supplement Figure 3: Quality control of NGS data. a/b) Mean and per sequence quality (phred) scores after adapter trimming. c) Read size distribution. d/e) Absolute and relative read classification. f) Numerical value for read classification. g) Number of distinct microRNAs (microRNA diversity) per sample showing an abundance of TPM>1, TPM>5 and TPM>10.

Supplement Table 1: List of all miRNAs with TPM >5 that were identified at each time point for each sample

Supplement Table 2-5: Correlation analysis of miRNA-expression and baseline characteristics/laboratory parameters

Supplement Table 6: KEGG enrichment details

Supplement Table 7a/7b: Genes regulated by at least one of the four differentially regulated miRNAs

# Supplement Figure 1

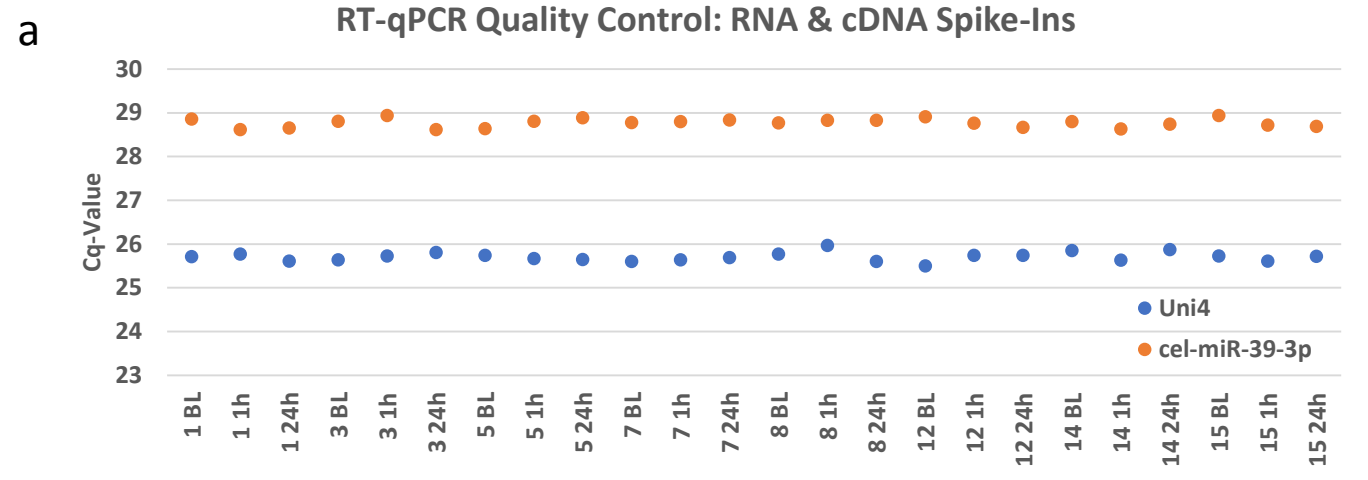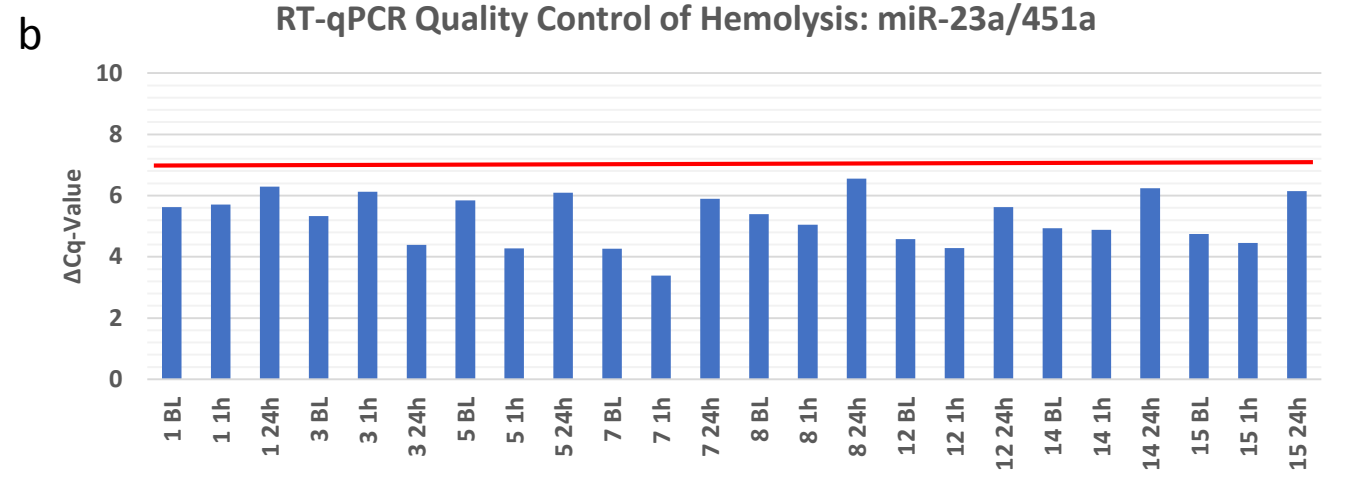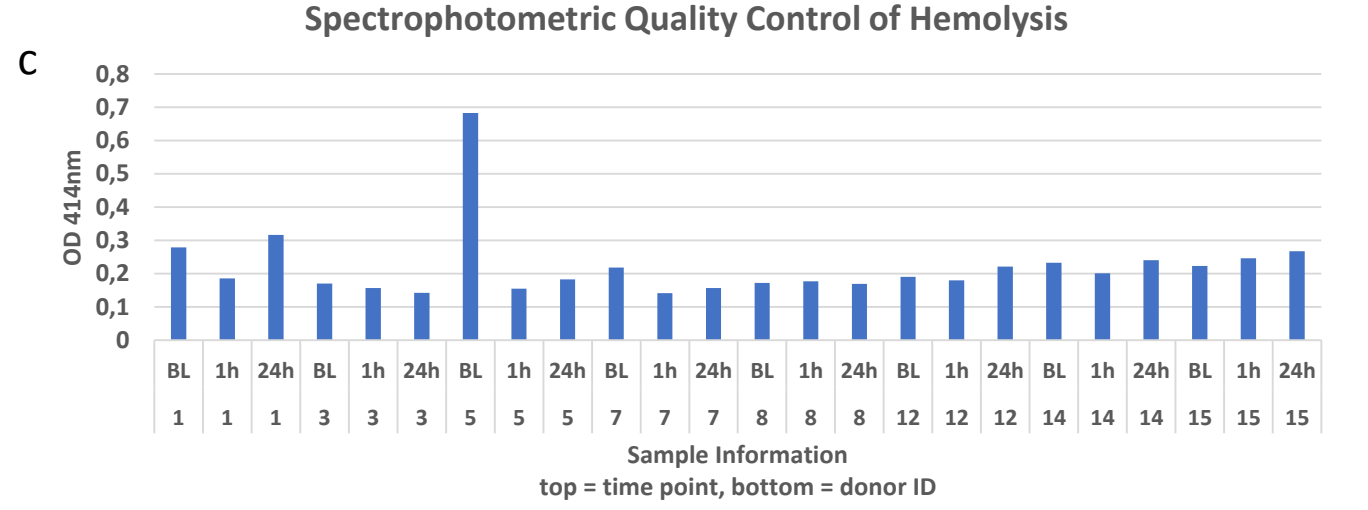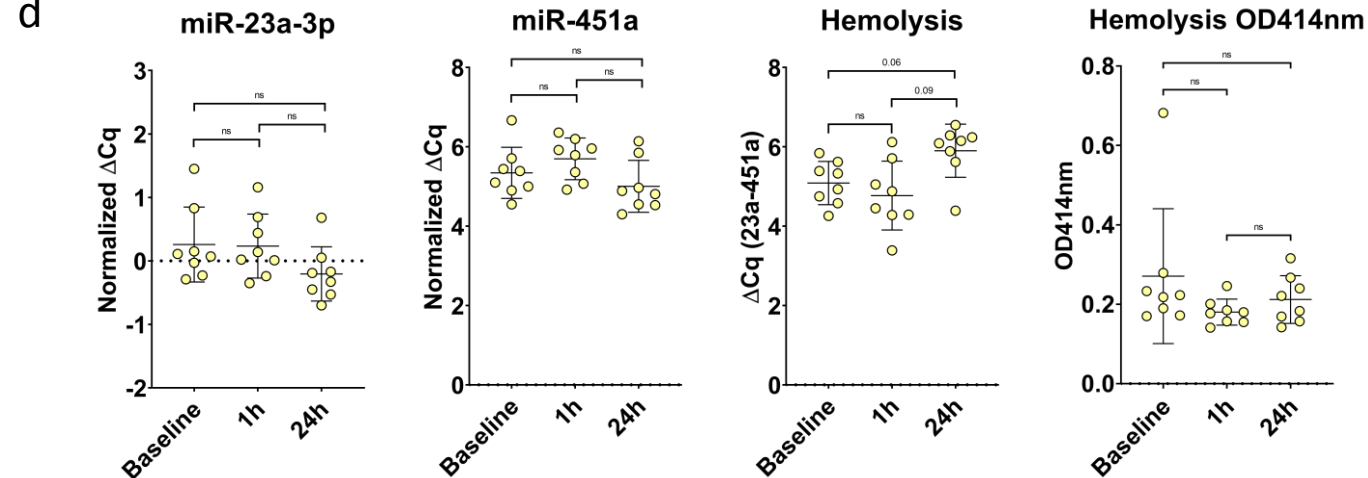

# Supplement Figure 2

## a RNA Spike-in recovery during NGS

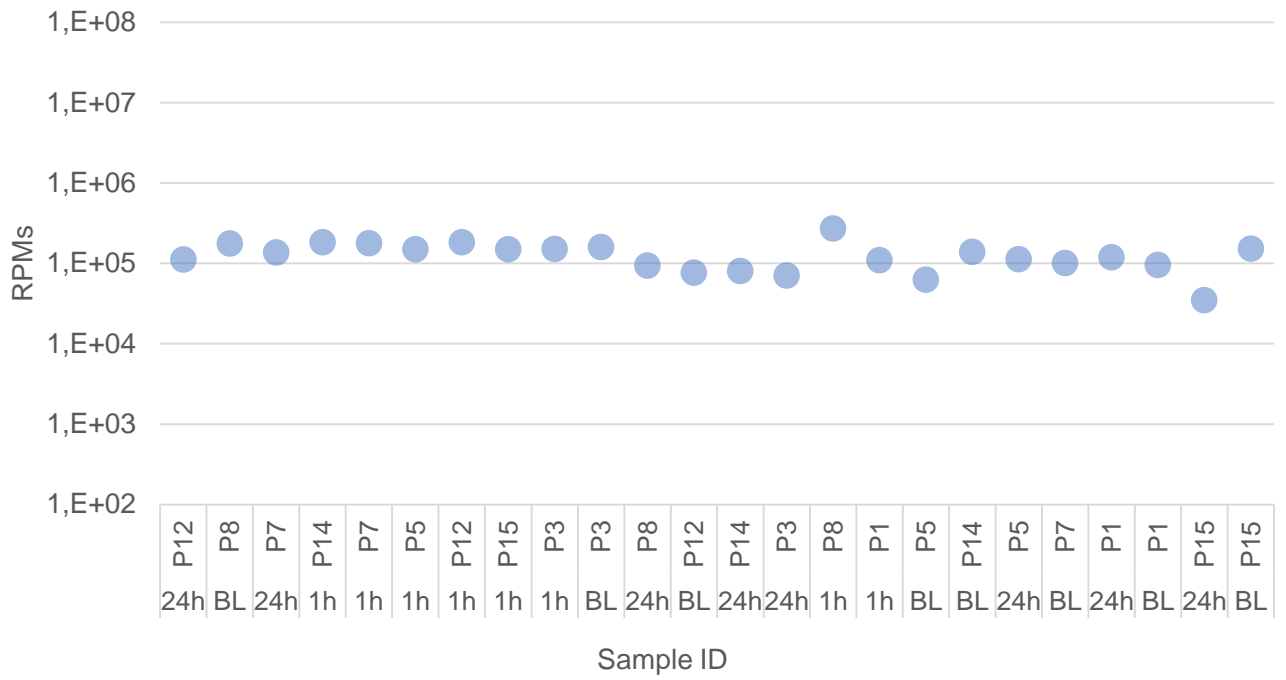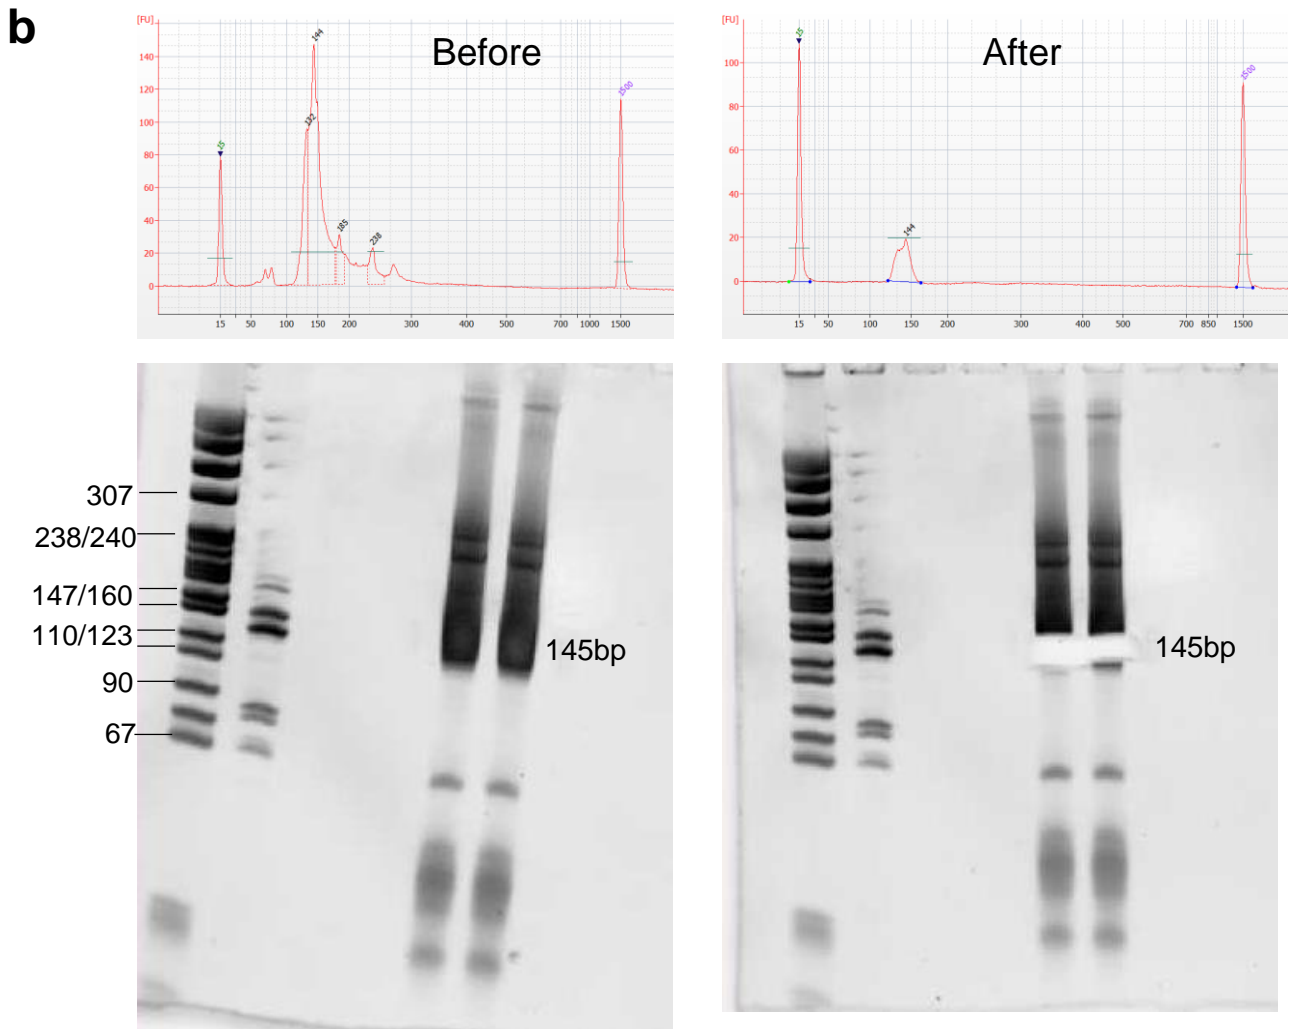

# Supplement Figure 3

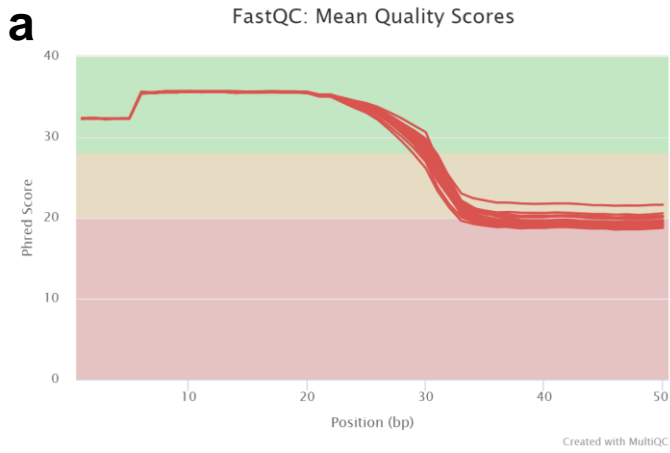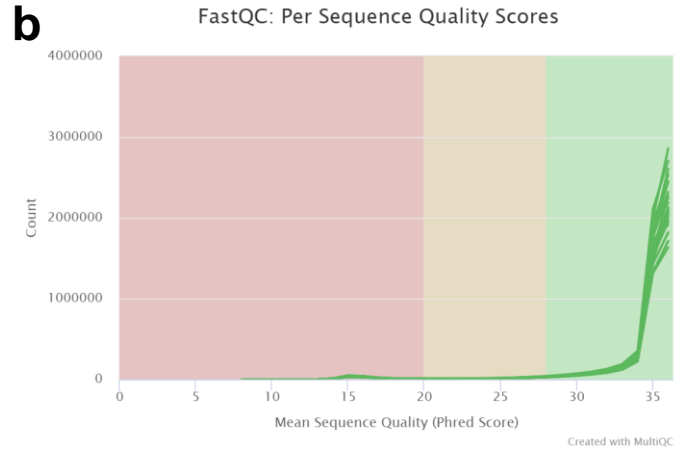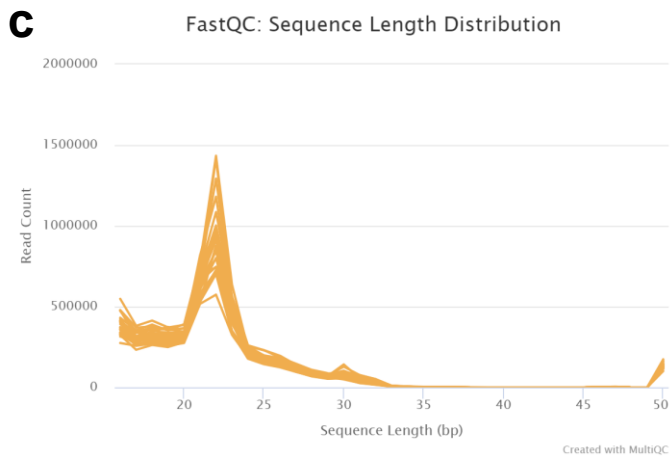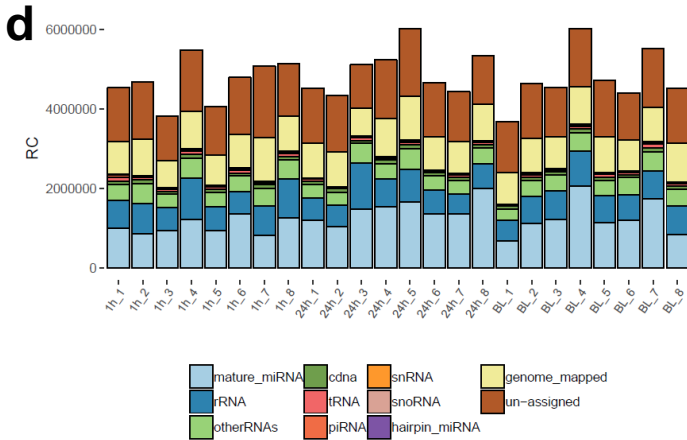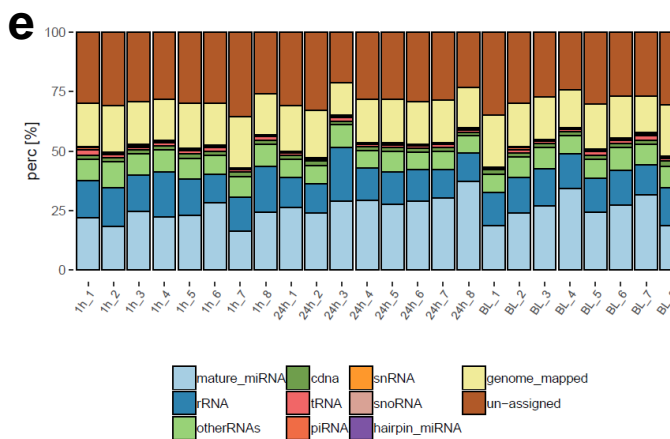

**f**

| sample     | mature_miRNA |       | rRNA    |       | otherRNAs |       | cdna   |      | tRNA   |      |
|------------|--------------|-------|---------|-------|-----------|-------|--------|------|--------|------|
|            | [#]          | [%]   | [#]     | [%]   | [#]       | [%]   | [#]    | [%]  | [#]    | [%]  |
| <b>1h</b>  |              |       |         |       |           |       |        |      |        |      |
| 1h_1       | 994990       | 21.93 | 710652  | 15.67 | 400661    | 8.83  | 80963  | 1.78 | 98928  | 2.18 |
| 1h_2       | 865665       | 18.47 | 756979  | 16.15 | 508387    | 10.84 | 88623  | 1.89 | 56394  | 1.20 |
| 1h_3       | 945871       | 24.78 | 575666  | 15.08 | 342428    | 8.97  | 64470  | 1.69 | 44196  | 1.16 |
| 1h_4       | 1229994      | 22.42 | 1030779 | 18.79 | 506795    | 9.24  | 95489  | 1.74 | 79561  | 1.45 |
| 1h_5       | 938311       | 23.12 | 608297  | 14.99 | 362195    | 8.93  | 72193  | 1.78 | 50946  | 1.26 |
| 1h_6       | 1360112      | 28.38 | 561464  | 11.71 | 392320    | 8.19  | 77044  | 1.61 | 73340  | 1.53 |
| 1h_7       | 822070       | 16.19 | 736655  | 14.51 | 434533    | 8.56  | 101825 | 2.01 | 50896  | 1.00 |
| 1h_8       | 1254062      | 24.36 | 987079  | 19.17 | 481780    | 9.36  | 82449  | 1.60 | 80497  | 1.56 |
| <b>24h</b> |              |       |         |       |           |       |        |      |        |      |
| 24h_1      | 1195726      | 26.41 | 569878  | 12.59 | 343267    | 7.58  | 78641  | 1.74 | 45288  | 1.00 |
| 24h_2      | 1041108      | 23.96 | 539986  | 12.42 | 330095    | 7.60  | 81950  | 1.89 | 30569  | 0.70 |
| 24h_3      | 1480674      | 28.96 | 1156794 | 22.63 | 494701    | 9.68  | 66465  | 1.30 | 78436  | 1.53 |
| 24h_4      | 1536782      | 29.35 | 714388  | 13.64 | 379793    | 7.25  | 86723  | 1.66 | 50487  | 0.96 |
| 24h_5      | 1663103      | 27.64 | 816143  | 13.56 | 521733    | 8.67  | 106525 | 1.77 | 62666  | 1.04 |
| 24h_6      | 1355014      | 29.07 | 611293  | 13.12 | 346300    | 7.43  | 78877  | 1.69 | 43454  | 0.93 |
| 24h_7      | 1351489      | 30.43 | 517847  | 11.66 | 342143    | 7.70  | 74657  | 1.68 | 58113  | 1.31 |
| 24h_8      | 2001861      | 37.41 | 624907  | 11.68 | 391774    | 7.32  | 83496  | 1.56 | 51758  | 0.97 |
| <b>BL</b>  |              |       |         |       |           |       |        |      |        |      |
| BL_1       | 688355       | 18.68 | 515637  | 14.00 | 282495    | 7.67  | 69534  | 1.89 | 22132  | 0.60 |
| BL_2       | 1113191      | 24.03 | 686802  | 14.83 | 398373    | 8.60  | 79717  | 1.72 | 68946  | 1.49 |
| BL_3       | 1227752      | 26.99 | 711545  | 15.64 | 420289    | 8.84  | 75988  | 1.65 | 44964  | 0.99 |
| BL_4       | 2063281      | 34.24 | 879527  | 14.60 | 459840    | 7.63  | 95059  | 1.58 | 65936  | 1.09 |
| BL_5       | 1142683      | 24.16 | 678361  | 14.35 | 379835    | 8.03  | 82718  | 1.75 | 68822  | 1.46 |
| BL_6       | 1208484      | 27.44 | 635599  | 14.43 | 429365    | 9.75  | 73712  | 1.67 | 53919  | 1.22 |
| BL_7       | 1748827      | 31.63 | 701461  | 12.69 | 473538    | 8.56  | 88358  | 1.60 | 106071 | 1.93 |
| BL_8       | 839508       | 18.57 | 721117  | 15.95 | 415335    | 9.19  | 94710  | 2.10 | 52394  | 1.16 |

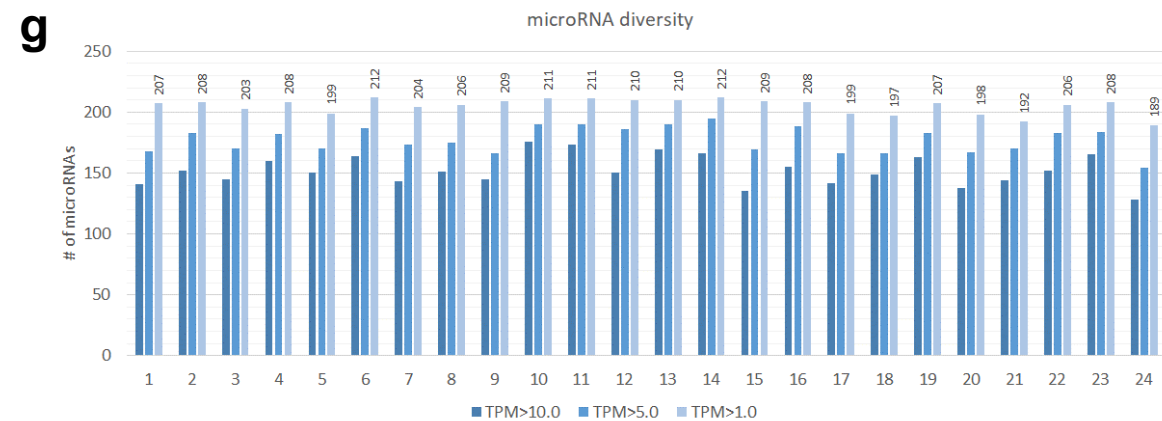

# Supplement Table 1

| microRNA ID     | p77005 | p77013  | p77015 | p77020  | p77021 | p77023  | p77025  | p77027  | p77007 | p77008  | p77009  | p77010  | p77011  | p77012  | p77018 | p77019  | p77004  | p77006 | p77014  | p77016  | p77017  | p77022  | p77024  | p77026  |
|-----------------|--------|---------|--------|---------|--------|---------|---------|---------|--------|---------|---------|---------|---------|---------|--------|---------|---------|--------|---------|---------|---------|---------|---------|---------|
| Donor ID        | P8     | P3      | P12    | P5      | P14    | P7      | P1      | P15     | P14    | P7      | P5      | P12     | P15     | P3      | P8     | P1      | P12     | P7     | P8      | P14     | P3      | P5      | P1      | P15     |
| Timepoint       | Oh     | Oh      | Oh     | Oh      | Oh     | Oh      | Oh      | Oh      | 1h     | 1h      | 1h      | 1h      | 1h      | 1h      | 1h     | 1h      | 24h     | 24h    | 24h     | 24h     | 24h     | 24h     | 24h     | 24h     |
| Sex             | female | male    | female | male    | female | female  | male    | male    | female | female  | male    | female  | male    | male    | female | male    | female  | female | female  | female  | male    | male    | male    | male    |
| hsa-miR-98-5p   | 73,28  | 120,45  | 100,48 | 293,07  | 113,98 | 439,85  | 55,16   | 56,41   | 80,46  | 372,22  | 318,53  | 120,84  | 167,34  | 145,63  | 75,04  | 398,92  | 75,97   | 111,37 | 751,52  | 72      | 66,81   | 140,96  | 91,87   | 40,17   |
| hsa-miR-6131    | 10,24  | 10,79   | 16,05  | 12,94   | 12,05  | 22,48   | 14,29   | 11,95   | 17,64  | 31,36   | 15,46   | 18,04   | 16,27   | 13,35   | 8,67   | 14,18   | 11,26   | 5,98   | 23,86   | 10,89   | 11,63   | 6,65    | 8,33    | 7,66    |
| hsa-miR-148a-5p | 1,63   | 13,38   | 23,09  | 14,11   | 19,24  | 21,57   | 35,45   | 15,93   | 22,04  | 30,08   | 26,2    | 23,51   | 14,54   | 16,69   | 5,32   | 12,24   | 4,64    | 11,5   | 8,02    | 12,41   | 53,68   | 9,23    | 18,46   | 16,82   |
| hsa-miR-185-5p  | 48,04  | 45,55   | 35,84  | 94,59   | 59,85  | 47,23   | 15,19   | 29,42   | 29,98  | 35,62   | 71,77   | 48,66   | 35,73   | 79,07   | 34,27  | 41,95   | 28,05   | 29,91  | 103,67  | 59,78   | 31,74   | 66,72   | 56,46   | 18,31   |
| hsa-miR-150-3p  | 8,96   | 25,04   | 21,77  | 21,08   | 7,82   | 16,8    | 22,06   | 43,58   | 6,61   | 6,83    | 41,65   | 8,57    | 37,21   | 13,56   | 15,17  | 102,93  | 11,04   | 19,33  | 64,16   | 14,13   | 24,26   | 17,38   | 17,11   | 35,13   |
| hsa-miR-342-3p  | 13,3   | 21,37   | 19,13  | 19,75   | 14,59  | 34,74   | 30,2    | 23,45   | 10,58  | 27,94   | 58,94   | 12,58   | 29,23   | 10,64   | 17,14  | 108,95  | 23,19   | 16,11  | 59,07   | 8,59    | 19,78   | 22,31   | 35,58   | 16,07   |
| hsa-miR-7-5p    | 15,47  | 26,55   | 8,57   | 27,38   | 23,26  | 25,43   | 12,66   | 15,49   | 11,02  | 25,17   | 38,77   | 17,68   | 17      | 42,56   | 21,86  | 8,55    | 17,45   | 25,77  | 41,66   | 39,15   | 19,94   | 22,96   | 13,51   | 19,43   |
| hsa-miR-144-3p  | 152    | 215,65  | 132,8  | 369,74  | 121,17 | 208,91  | 178,69  | 129,86  | 127,64 | 123,08  | 198,04  | 145,08  | 174,48  | 525,34  | 198,35 | 260,64  | 145,09  | 207,77 | 393,17  | 148,01  | 105,36  | 420,72  | 387,28  | 179,76  |
| hsa-miR-26b-5p  | 423,15 | 1085,81 | 559,98 | 955,71  | 748,39 | 1509,63 | 291,36  | 458,39  | 525,54 | 1490,16 | 1421,87 | 774,62  | 749,69  | 1422,05 | 529,45 | 1300,47 | 442,35  | 669,34 | 1587,15 | 540,46  | 350,16  | 936,92  | 827,7   | 255,06  |
| hsa-miR-181c-5p | 51,57  | 71,24   | 58,48  | 65,22   | 51,39  | 149,65  | 79,4    | 23,01   | 42,77  | 138,86  | 83,3    | 68,35   | 87,98   | 47,36   | 32,3   | 56,52   | 9,28    | 21,17  | 35,4    | 38,19   | 75,28   | 29,61   | 47,06   | 29,71   |
| hsa-miR-1224-5p | 2,17   | 6,48    | 3,08   | 6,97    | 2,11   | 1,36    | 7,05    | 0,22    | 3,53   | 1,28    | 14,41   | 6,2     | 1,48    | 5,42    | 3,74   | 0,78    | 3,09    | 10,12  | 3,91    | 5,73    | 3,66    | 17,59   | 2,03    | 3,36    |
| hsa-miR-93-5p   | 310,51 | 621,91  | 213,92 | 801,54  | 582,39 | 710,76  | 372,75  | 263,71  | 358,44 | 593,63  | 783,76  | 548,06  | 381,99  | 870,63  | 358,87 | 662,66  | 305,2   | 394,61 | 1374,53 | 412,7   | 219,2   | 737,82  | 631,59  | 181,63  |
| hsa-miR-148a-3p | 343,62 | 1167,41 | 506,78 | 1039,52 | 492,94 | 1153,34 | 1254,24 | 756,16  | 488,95 | 1207,53 | 1414,8  | 982,03  | 1016,59 | 738,36  | 394,72 | 686,16  | 269,9   | 312,97 | 380,99  | 878,13  | 526,28  | 939,83  | 548,24  |         |
| hsa-miR-185-3p  | 2,99   | 7,99    | 2,86   | 14,44   | 0      | 11,13   | 5,43    | 6,42    | 4,41   | 21,12   | 12,31   | 7,11    | 10,1    | 5,22    | 8,86   | 9,52    | 5,52    | 11,74  | 3,82    | 0       | 9,65    | 5,18    | 11,21   |         |
| hsa-miR-19b-3p  | 12,76  | 18,56   | 11,65  | 31,03   | 17,76  | 37,24   | 10,13   | 15,93   | 6,61   | 32,85   | 22,27   | 14,58   | 16,51   | 27,33   | 7,68   | 22,72   | 8,39    | 13,58  | 28,95   | 14,51   | 17,78   | 23,6    | 13,28   | 6,54    |
| hsa-miR-1260b   | 6,79   | 11,23   | 4,18   | 3,32    | 2,75   | 11,35   | 3,44    | 2,88    | 1,32   | 12,16   | 7,07    | 14,95   | 6,41    | 8,55    | 5,52   | 9,13    | 8,61    | 1,38   | 12,32   | 0       | 4,99    | 6,44    | 0,9     | 2,62    |
| hsa-miR-1260a   | 2,99   | 2,16    | 0      | 0       | 2,75   | 6,81    | 1,81    | 1,15    | 1,32   | 12,37   | 9,69    | 5,29    | 4,68    | 8,14    | 8,47   | 10,29   | 1,99    | 2,76   | 3,52    | 2,67    | 10,97   | 1,5     | 7,43    | 0       |
| hsa-miR-122-5p  | 595,78 | 4092,41 | 729,93 | 3033,42 | 354,64 | 644,68  | 5147,19 | 2938,81 | 779,93 | 590,86  | 3077,66 | 1017,21 | 3697,68 | 3413,26 | 604,49 | 3392,16 | 1508,57 | 866,53 | 355,81  | 1077,67 | 1238,93 | 1706,28 | 4893,49 | 1042,11 |
| hsa-let-7c-5p   | 127,03 | 270,48  | 139,83 | 218,23  | 136,19 | 168,95  | 414,89  | 222,34  | 188,92 | 167,87  | 176,56  | 161,48  | 325,06  | 263,71  | 146,94 | 177,86  | 187,98  | 146,29 | 158,54  | 181,29  | 290,91  | 117,16  |         |         |
| hsa-miR-483-5p  | 18,46  | 64,54   | 15,17  | 59,08   | 9,73   | 35,2    | 117,38  | 91,37   | 16,31  | 26,24   | 74,92   | 28,8    | 92,91   | 50,7    | 15,95  | 62,34   | 26,28   | 25,31  | 10,17   | 15,09   | 32,24   | 36,69   | 81,96   | 63,53   |
| hsa-miR-126-3p  | 11,67  | 16,84   | 16,71  | 30,37   | 19,46  | 35,42   | 18,81   | 42,48   | 23,15  | 33,28   | 30,39   | 15,49   | 34,26   | 24,2    | 7,88   | 17,09   | 10,6    | 17,95  | 22,89   | 1,72    | 16,45   | 21,45   | 15,99   | 8,97    |
| hsa-miR-127-3p  | 60,53  | 18,13   | 52,99  | 18,42   | 6,77   | 146,24  | 44,31   | 14,16   | 20,28  | 87,24   | 26,98   | 11,48   | 16,76   | 55,91   | 32,3   | 39,23   | 50,79   | 34,51  | 73,16   | 17,57   | 114,17  | 5,15    | 70,25   | 16,07   |
| hsa-miR-4286    | 1,36   | 7,34    | 3,3    | 5,64    | 9,09   | 19,53   | 7,23    | 4,2     | 2,87   | 24,1    | 13,36   | 13,12   | 7,89    | 7,3     | 4,92   | 8,93    | 0,66    | 4,14   | 4,3     | 3,82    | 5,32    | 2,79    | 6,3     | 0       |
| hsa-miR-130a-3p | 26,06  | 35,83   | 11,65  | 23,07   | 16,92  | 66,31   | 20,26   | 27,87   | 18,08  | 20,9    | 40,6    | 10,21   | 31,55   | 38,18   | 26,2   | 21,95   | 39,97   | 23,93  | 34,82   | 20,63   | 20,61   | 33,04   | 55,62   | 29,52   |
| hsa-miR-361-5p  | 17,64  | 41,66   | 12,97  | 40,66   | 25,8   | 25,43   | 17,18   | 21,46   | 18,3   | 71,46   | 63,92   | 34,63   | 36,97   | 35,89   | 26,98  | 23,31   | 13,69   | 16,34  | 33,25   | 20,05   | 14,29   | 28,75   | 25,89   | 5,42    |
| hsa-miR-4710    | 6,79   | 3,67    | 0      | 3,65    | 0      | 4,77    | 15,01   | 6,19    | 3,97   | 4,91    | 3,14    | 4,92    | 1,97    | 8,14    | 7,09   | 1,75    | 14,35   | 11,73  | 0,98    | 8,98    | 0       | 7,51    | 1,13    | 5,23    |
| hsa-miR-5010-5p | 8,69   | 4,96    | 17,37  | 5,64    | 0      | 1,36    | 4,16    | 2,65    | 2,2    | 3,2     | 6,02    | 6,93    | 12,08   | 6,05    | 4,33   | 1,36    | 5,3     | 3,68   | 2,93    | 6,49    | 0       | 4,29    | 2,13    | 2,43    |
| hsa-miR-873-3p  | 3,26   | 3,67    | 1,1    | 2,32    | 1,9    | 4,09    | 12,12   | 7,08    | 1,98   | 5,55    | 3,67    | 3,1     | 2,71    | 7,93    | 5,32   | 1,17    | 9,94    | 0      | 3,33    | 4,97    | 23,27   | 2,79    | 1,35    | 10,09   |
| hsa-miR-484     | 41,8   | 33,89   | 28,14  | 54,76   | 48,64  | 79,71   | 59,32   | 40,04   | 47,4   | 61,43   | 73,35   | 55,41   | 35,73   | 86,17   | 31,91  | 55,93   | 47,04   | 37,05  | 64,35   | 46,6    | 27,25   | 64,36   | 94,34   | 22,24   |
| hsa-miR-99a-5p  | 16,01  | 29,36   | 23,31  | 19,58   | 20,51  | 28,16   | 79,4    | 28,76   | 13,23  | 38,4    | 42,7    | 20,05   | 42,14   | 24,41   | 16,94  | 25,44   | 15,19   | 6,26   | 6,88    | 38,56   | 30,25   | 37,6    | 22,8    |         |
| hsa-miR-425-5p  | 162,86 | 337,18  | 89,92  | 465,33  | 241,92 | 391,03  | 216,3   | 215,92  | 188,48 | 482,29  | 469,68  | 303,65  | 345,52  | 641,29  | 186,92 | 281,03  | 176,67  | 167,28 | 339,96  | 234,52  | 176,32  | 366,66  | 507,52  | 168,36  |
| hsa-miR-3615    | 39,9   | 128,87  | 59,36  | 107,37  | 137,03 | 163,72  | 27,49   | 58,4    | 70,76  | 224,61  | 186,51  | 133,05  | 131,6   | 97,02   | 38,01  | 69,72   | 56,98   | 32,44  | 89,39   | 61,11   | 24,6    | 59,43   | 66,87   | 36,06   |
| hsa-miR-361-3p  | 2,99   | 16,41   | 3,52   | 13,61   | 17,13  | 12,26   | 6,87    | 15,04   | 5,07   | 34,34   | 33,79   | 12,39   | 5,42    | 12,73   | 4,33   | 27,19   | 7,51    | 2,3    | 38,73   | 6,68    | 5,15    | 9,65    | 20,26   | 7,1     |
| hsa-miR-30d-5p  | 809,93 | 1363,52 | 582,85 | 1434,81 | 891,77 | 1803,7  | 1092,19 | 1016,99 | 780,59 | 1466,48 | 1869,55 | 939,38  | 1451,82 | 1615,87 | 737,57 | 1314,64 | 669,37  | 900,82 | 1178,53 | 723,03  | 747,18  | 1353,34 | 1429,79 | 704,83  |
| hsa-miR-107     | 411,21 | 793,74  | 352,25 | 922,86  | 365,42 | 555,66  | 605,28  | 453,45  | 359,21 | 687,88  | 340,28  | 832     | 1099,75 | 361,04  | 759,58 | 353,57  | 495,16  | 636,11 | 428,36  | 713,77  | 953,44  | 922,95  | 1004,36 |         |
| hsa-miR-3960    | 11,67  | 28,28   | 27,92  | 7,97    | 21,57  | 14,31   | 37,26   | 5,75    | 23,15  | 9,17    | 12,57   | 25,52   | 11,83   | 20,45   | 10,24  | 13,98   | 16,12   | 19,1   | 15,26   | 29,22   | 3,99    | 24,24   | 17,79   | 6,91    |
| hsa-miR-3168    | 18,19  | 21,15   | 28,58  | 15,1    | 61,54  | 24,07   | 204,01  | 11,5    | 27,34  | 15,36   | 25,41   | 78,92   | 24,89   | 39,85   | 21,67  | 53,8    | 64,93   | 56,14  | 36,38   | 22,54   | 13,13   | 32,18   | 22,74   | 85,58   |
| hsa-miR-425-3p  | 15,74  | 38,64   | 14,73  | 33,19   | 18,82  | 39,97   | 14,47   | 15,49   | 16,97  | 46,71   | 41,65   | 26,61   | 38,69   | 35,26   | 7,68   | 19,62   | 22,97   | 3,45   | 23,28   | 17,76   | 24,76   | 24,46   | 20,26   | 16,07   |
| hsa-miR-130b-3p | 36,37  | 26,12   | 20,67  | 77,83   | 28,34  | 26,11   | 24,96   | 28,54   | 22,26  | 27,3    | 38,24   | 19,68   | 38,94   | 28,17   | 20,68  | 29,33   | 30,92   | 20,02  | 33,64   | 27,5    | 21,27   | 44,84   | 24,99   | 11,96   |
| hsa-miR-1307-5p | 4,34   | 9,93    | 0      | 8,3     | 1,27   | 6,13    | 8,86    | 8,85    | 2,65   | 6,83    | 17,29   | 8,57    | 10,6    | 9,6     | 2,17   | 3,69    | 0,88    | 0      | 2,74    | 3,63    | 13,63   | 18,88   | 2,03    | 3,18    |
| hsa-miR-769-5p  | 11,4   | 31,52   | 16,27  | 32,03   | 20,94  | 32,47   | 7,78    | 14,38   | 17,64  | 48,85   | 66,54   | 24,42   | 27,36   | 12,1    | 6,89   | 20,78   | 10,82   | 14,73  | 12,13   | 4,01    | 30,58   | 10,08   | 14,86   | 18,5    |
| hsa-miR-100-5p  | 31,49  | 36,91   | 33,42  | 46,13   | 35,74  | 32,25   | 81,57   | 53,32   | 21,16  | 32,42   | 56,58   | 46,29   | 65,55   | 64,89   | 45,7   | 40,4    | 28,49   | 31,98  | 16,63   | 8,59    | 67,31   | 51,71   | 43,68   | 40,74   |
| hsa-miR-152-3p  | 4,34   | 9,71    | 5,5    | 12,94   | 5,92   | 28,84   | 13,2    | 7,74    | 3,31   | 13,22   | 11,79   | 5,29    | 12,08   | 6,88    | 2,36   | 7,77    | 4,42    | 14,96  | 17,41   | 9,36    | 15,12   | 14,59   | 14,41   | 10,84   |
| hsa-miR-10a-5p  | 521,14 | 477,93  | 538,44 | 401,77  | 327,57 | 589,27  | 601,53  | 760,36  | 648,77 | 658,48  | 680,29  | 561,37  | 828,31  | 427,49  | 596,22 | 417,37  | 498,22  | 705,01 | 288,32  | 351,78  | 551,91  | 556,1   | 497,61  | 529,93  |
| hsa-miR-92b-5p  | 8,41   |         |        |         |        |         |         |         |        |         |         |         |         |         |        |         |         |        |         |         |         |         |         |         |

|                   |          |          |          |          |          |          |          |          |          |          |          |          |          |         |          |          |          |          |          |          |          |          |          |          |
|-------------------|----------|----------|----------|----------|----------|----------|----------|----------|----------|----------|----------|----------|----------|---------|----------|----------|----------|----------|----------|----------|----------|----------|----------|----------|
| hsa-miR-1246      | 392,48   | 2069,08  | 2846,52  | 1740,5   | 1336,07  | 3366,01  | 1540,18  | 1073,18  | 1572,87  | 3363,84  | 2863,65  | 2135,21  | 1840,46  | 960,14  | 770,53   | 1099,45  | 939,02   | 805,1    | 611,66   | 1331,86  | 2503,11  | 555,67   | 997,93   | 1094,61  |
| hsa-miR-5481      | 2,71     | 0        | 3,52     | 0,83     | 3,38     | 5        | 1,63     | 0        | 1,1      | 3,84     | 4,45     | 1,82     | 3,2      | 3,96    | 4,14     | 3,88     | 3,75     | 2,07     | 3,72     | 3,25     | 1,33     | 1,29     | 0,45     | 0        |
| hsa-miR-23a-3p    | 67,31    | 70,37    | 37,16    | 71,69    | 53,5     | 69,49    | 53,35    | 81,41    | 53,79    | 112,63   | 152,46   | 74,18    | 90,45    | 74,9    | 57,91    | 72,64    | 68,02    | 51,54    | 48,51    | 38,19    | 63,65    | 68,01    | 55,39    | 44,85    |
| hsa-miR-1228-5p   | 2,99     | 2,59     | 0        | 2,66     | 12,48    | 5,68     | 4,88     | 4,42     | 9,04     | 3,2      | 10,74    | 2,37     | 19,72    | 2,92    | 4,73     | 7,19     | 5,96     | 2,99     | 1,17     | 5,54     | 0        | 8,58     | 4,95     | 0        |
| hsa-miR-382-5p    | 17,64    | 6,69     | 9,89     | 7,3      | 9,3      | 38,38    | 8,86     | 6,42     | 2,87     | 17,28    | 12,31    | 12,94    | 16,76    | 17,73   | 15,36    | 15,34    | 17,67    | 6,21     | 24,26    | 0,76     | 31,41    | 10,73    | 23,19    | 0        |
| hsa-miR-574-5p    | 45,6     | 58,5     | 19,35    | 61,57    | 49,06    | 113,54   | 21,88    | 66,81    | 31,08    | 76,58    | 126,26   | 41,56    | 116,08   | 57,37   | 40,38    | 68,36    | 54,77    | 41,19    | 46,75    | 48,32    | 22,77    | 76,59    | 53,81    | 38,68    |
| hsa-miR-30a-3p    | 18,19    | 26,12    | 24,18    | 23,57    | 39,76    | 20,66    | 14,29    | 16,81    | 31,3     | 21,76    | 27,5     | 18,04    | 35,49    | 48,4    | 13,98    | 19,23    | 9,28     | 16,8     | 18,58    | 17,19    | 10,47    | 13,95    | 16,66    | 11,4     |
| hsa-miR-4446-3p   | 24,7     | 11,66    | 9,01     | 14,77    | 5,5      | 49,73    | 13,75    | 0,66     | 9,48     | 30,93    | 20,69    | 0        | 22,92    | 6,88    | 16,15    | 18,26    | 8,17     | 25,31    | 20,73    | 4,97     | 28,58    | 24,89    | 16,66    | 3,55     |
| hsa-miR-150-5p    | 52,11    | 56,77    | 30,12    | 45,97    | 106,16   | 33,83    | 28,76    | 82,52    | 47,4     | 74,23    | 68,89    | 17,5     | 53,97    | 106,61  | 41,95    | 61,022   | 43,73    | 50,85    | 515,62   | 37,24    | 30,91    | 78,52    | 41,66    | 33,07    |
| hsa-miR-106b-3p   | 131,64   | 254,08   | 185,34   | 527,73   | 269,41   | 313,37   | 193,88   | 119,24   | 176,36   | 301,62   | 347,35   | 273,03   | 208,74   | 355,72  | 157,97   | 365,12   | 195,67   | 177,63   | 484,91   | 254,38   | 158,38   | 352,5    | 305,32   | 152,29   |
| hsa-miR-155-5p    | 68,4     | 91,53    | 51,67    | 71,03    | 83,95    | 127,16   | 68,73    | 90,04    | 75,39    | 108,15   | 116,57   | 58,51    | 134,81   | 120,38  | 55,35    | 402,8    | 58,3     | 59,59    | 620,66   | 51,18    | 31,24    | 90,75    | 63,05    | 38,49    |
| hsa-miR-199b-3p   | 154,17   | 210,47   | 118,94   | 178,07   | 125,4    | 388,31   | 128,05   | 163,93   | 150,78   | 368,81   | 365,42   | 190,1    | 250,64   | 246,81  | 174,51   | 151,68   | 116,6    | 173,49   | 129,1    | 94,15    | 108,52   | 202,75   | 164,14   | 42,98    |
| hsa-miR-191-5p    | 305,9    | 421,8    | 692,78   | 660,49   | 479,19   | 1285,5   | 333,68   | 246,89   | 479,47   | 1340,84  | 979,7    | 792,48   | 576,68   | 514,91  | 329,33   | 396,98   | 308,96   | 261,62   | 609,9    | 322,37   | 546,92   | 458,7    | 350,36   | 194,71   |
| hsa-miR-26a-5p    | 1033,59  | 1981,01  | 1284,42  | 1773,52  | 1386,4   | 4718,25  | 954,02   | 1120,53  | 1380,2   | 3978,81  | 3053,57  | 1572,02  | 2384,62  | 2741,25 | 1214,89  | 3654,74  | 944,98   | 1100,08  | 4031,06  | 977,6    | 1417,91  | 1719,37  | 1560,61  | 727,62   |
| hsa-miR-3614-5p   | 3,26     | 13,38    | 12,31    | 12,11    | 15,65    | 14,53    | 8,86     | 7,52     | 19,62    | 20,05    | 23,05    | 6,2      | 2,22     | 8,35    | 0,98     | 5,05     | 0        | 2,15     | 15,09    | 7,98     | 0,64     | 5,4      | 3,55     |          |
| hsa-miR-181b-5p   | 56,19    | 119,37   | 81,35    | 184,7    | 112,08   | 143,06   | 80,12    | 104,64   | 76,27    | 116,04   | 221,09   | 93,14    | 198,39   | 127,27  | 64,21    | 146,83   | 50,13    | 52,69    | 262,31   | 59,39    | 61,16    | 191,37   | 87,81    | 83,71    |
| hsa-miR-493-5p    | 16,01    | 6,91     | 12,09    | 3,15     | 4,02     | 29,52    | 1,45     | 3,32     | 0        | 13,86    | 0        | 1,73     | 19,61    | 5,32    | 15,73    | 7,29     | 3,45     | 16,04    | 0,57     | 0        | 4,29     | 21,84    | 0        |          |
| hsa-miR-324-5p    | 19,54    | 33,68    | 14,03    | 64,22    | 60,69    | 24,98    | 52,99    | 15,49    | 43,65    | 30,08    | 78,32    | 50,3     | 25,88    | 56,33   | 25,61    | 45,83    | 25,18    | 46,02    | 59,86    | 43,54    | 13,29    | 64,58    | 62,6     | 15,88    |
| hsa-miR-877-5p    | 8,14     | 0,86     | 3,08     | 3,82     | 2,33     | 4,54     | 11,57    | 7,3      | 6,17     | 14,08    | 5,24     | 7,47     | 11,09    | 1,04    | 2,56     | 5,05     | 0        | 4,6      | 3,52     | 0,95     | 3,32     | 8,37     | 10,58    | 9,72     |
| hsa-miR-574-3p    | 5,43     | 16,62    | 5,94     | 13,94    | 15,01    | 8,17     | 13,75    | 5,75     | 5,29     | 29,65    | 22,79    | 12,39    | 16,76    | 14,4    | 12,01    | 21,75    | 1,1      | 13,35    | 6,06     | 4,58     | 3,99     | 7,08     | 18,46    | 1,49     |
| hsa-miR-1304-3p   | 3,26     | 9,28     | 6,6      | 14,44    | 10,36    | 14,31    | 1,63     | 8,19     | 19,62    | 13,01    | 7,47     | 13,8     | 4,38     | 17,14   | 6,21     | 4,64     | 2,53     | 3,33     | 2,86     | 7,15     | 23,6     | 15,54    | 4,11     |          |
| hsa-let-7g-5p     | 237,5    | 690,13   | 281,86   | 702,97   | 552,15   | 793,64   | 194,42   | 254,19   | 346,98   | 775,37   | 799,21   | 492,47   | 419,7    | 825,78  | 315,54   | 1626,36  | 277,16   | 366,31   | 1822,27  | 360,18   | 106,69   | 680,11   | 592,41   | 136,03   |
| hsa-miR-16-2-3p   | 107,48   | 165,14   | 34,3     | 210,09   | 106,58   | 178,26   | 40,87    | 80,31    | 57,76    | 129,9    | 157,69   | 102,07   | 110,9    | 241,39  | 96,71    | 180,04   | 86,13    | 117,58   | 275,22   | 109,05   | 14,46    | 164,56   | 194,99   | 49,52    |
| hsa-miR-126-5p    | 536,61   | 492,61   | 281,86   | 488,39   | 279,56   | 730,29   | 490,98   | 592,89   | 521,79   | 685      | 350,49   | 717,65   | 789,47   | 460,9   | 380,47   | 380,47   | 380,47   | 529,91   | 441,09   | 279,01   | 283,18   | 684,19   | 596,46   | 267,39   |
| hsa-miR-19a-3p    | 2,44     | 6,26     | 1,54     | 3,98     | 2,54     | 4,77     | 3,62     | 4,65     | 3,75     | 10,24    | 4,98     | 9,3      | 7,15     | 6,05    | 2,95     | 1,36     | 3,53     | 4,37     | 5,67     | 4,01     | 0        | 1,93     | 7,43     | 1,49     |
| hsa-miR-181a-2-3p | 10,04    | 26,77    | 5,94     | 25,06    | 11,42    | 36,79    | 14,47    | 21,24    | 15,87    | 43,3     | 28,55    | 9,66     | 26,62    | 14,81   | 10,05    | 22,14    | 13,25    | 8,28     | 80,59    | 14,51    | 20,77    | 32,61    | 15,31    | 9,34     |
| hsa-miR-132-3p    | 2,44     | 8,42     | 5,72     | 12,11    | 0        | 7,27     | 4,16     | 2,21     | 11,02    | 13,01    | 17,55    | 8,57     | 23,17    | 8,97    | 4,14     | 6,8      | 1,99     | 6,44     | 9,78     | 5,92     | 4,32     | 4,29     | 12,61    | 0        |
| hsa-let-7b-5p     | 14278,32 | 22210,34 | 14279,67 | 30184,72 | 17576,37 | 22040,15 | 21454,87 | 14479,67 | 18725,42 | 19991,26 | 26491,12 | 16519,04 | 18108,39 | 28509,5 | 13969,63 | 26914,54 | 14441,55 | 18007,83 | 29310,45 | 20071,45 | 11484,36 | 27788,42 | 25174,54 | 16081,93 |
| hsa-miR-192-5p    | 580,04   | 1654,19  | 697,83   | 1196,67  | 638,64   | 775,02   | 2688,62  | 850,85   | 921,9    | 721,83   | 1065,36  | 808,7    | 927,62   | 1613,58 | 484,34   | 1189,96  | 1286,41  | 1131,83  | 604,62   | 862,25   | 1004,93  | 1097,19  | 1826,76  | 651,01   |
| hsa-miR-323a-3p   | 9,23     | 3,89     | 4,4      | 1,16     | 0        | 12,49    | 3,98     | 3,32     | 8,16     | 3,84     | 6,81     | 2        | 9,86     | 13,14   | 6,11     | 9,13     | 4,86     | 8,97     | 14,47    | 2,67     | 9,14     | 8,8      | 12,83    | 2,8      |
| hsa-miR-28-5p     | 2,99     | 19       | 7,7      | 7,47     | 10,57    | 22,94    | 1,45     | 15,71    | 3,97     | 21,12    | 14,15    | 3,46     | 17,25    | 8,55    | 7,09     | 18,45    | 3,75     | 3,91     | 26,21    | 0,19     | 0,17     | 4,08     | 5,63     | 0,19     |
| hsa-miR-942-5p    | 2,99     | 0        | 4,4      | 2,49     | 2,11     | 1,36     | 1,81     | 1,33     | 2,2      | 10,67    | 3,14     | 2,55     | 1,97     | 2,92    | 2,17     | 1,75     | 0,22     | 0        | 6,06     | 0        | 1,07     | 4,05     | 1,31     |          |
| hsa-miR-197-3p    | 9,5      | 41,01    | 24,18    | 24,56    | 34,26    | 38,38    | 4,7      | 8,19     | 16,75    | 78,5     | 57,63    | 23,88    | 37,21    | 21,7    | 12,01    | 16,12    | 16,34    | 10,35    | 18,39    | 21,58    | 5,98     | 12,44    | 6,53     | 6,35     |
| hsa-miR-744-5p    | 65,68    | 85,48    | 68,6     | 100,9    | 79,09    | 226,17   | 34,18    | 21,46    | 55,99    | 134,38   | 132,81   | 77,28    | 89,95    | 56,33   | 27,38    | 51,86    | 52,56    | 58,44    | 74,13    | 63,4     | 78,61    | 59,64    | 53,36    | 25,79    |
| hsa-miR-598-3p    | 13,3     | 8,42     | 6,6      | 36,68    | 27,91    | 26,8     | 3,62     | 10,62    | 1,98     | 16,21    | 19,65    | 11,66    | 17,99    | 12,31   | 6,11     | 16,31    | 7,29     | 12,66    | 31,88    | 18,91    | 6,48     | 24,89    | 9,36     | 13,45    |
| hsa-miR-206       | 24,7     | 11,01    | 9,45     | 17,26    | 15,44    | 2,04     | 9,95     | 78,54    | 13,67    | 12,59    | 29,6     | 21,69    | 144,66   | 16,27   | 75,04    | 1,94     | 5,52     | 8,28     | 14,08    | 7,83     | 13,13    | 65,22    | 4,5      | 49,33    |
| hsa-miR-210-3p    | 5,7      | 18,78    | 3,08     | 16,93    | 5,29     | 9,76     | 11,21    | 7,3      | 4,19     | 13,22    | 8,38     | 6,74     | 4,44     | 15,23   | 6,89     | 20,39    | 1,9      | 7,13     | 13,11    | 13,56    | 5,48     | 9,87     | 17,56    | 6,17     |
| hsa-miR-200a-3p   | 42,89    | 32,81    | 15,39    | 128,78   | 46,31    | 32,02    | 50,28    | 9,07     | 51,36    | 27,09    | 177,88   | 29,16    | 24,15    | 22,95   | 12,41    | 6,74     | 56,31    | 73,4     | 10,95    | 50,23    | 42,05    | 180,65   | 36,25    | 48,96    |
| hsa-miR-17-5p     | 9,77     | 11,44    | 10,11    | 24,23    | 21,78    | 30,43    | 0        | 13,72    | 6,61     | 9,09     | 29,08    | 26,43    | 3,7      | 19,61   | 9,65     | 6,99     | 14,58    | 14,96    | 27,78    | 18,52    | 0        | 10,94    | 22,07    | 7,85     |
| hsa-miR-29a-3p    | 7,87     | 36,48    | 10,11    | 31,2     | 8,67     | 29,95    | 12,66    | 27,65    | 24,91    | 48,21    | 65,23    | 32,44    | 33,27    | 30,67   | 13       | 56,13    | 14,35    | 19,56    | 52,23    | 13,94    | 8,14     | 26,82    | 27,92    | 14,2     |
| hsa-miR-30c-5p    | 12,49    | 17,05    | 12,31    | 23,23    | 15,44    | 59,75    | 9,26     | 18,36    | 2,42     | 61,01    | 38,77    | 14,76    | 22,67    | 31,71   | 18,12    | 31,27    | 11,48    | 10,81    | 27,19    | 9,36     | 4,65     | 11,16    | 18,24    | 2,8      |
| hsa-miR-424-3p    | 0        | 6,69     | 0        | 19,58    | 6,13     | 8,63     | 2,89     | 4,87     | 16,75    | 24,96    | 13,62    | 15,13    | 10,35    | 10,43   | 2,17     | 14,37    | 6,4      | 6,21     | 5,67     | 4,97     | 6,98     | 8,37     | 19,81    | 3,55     |
| hsa-miR-17-3p     | 5,97     | 6,69     | 1,1      | 10,29    | 5,71     | 2,04     | 0,65     | 2,65     | 5,55     | 14,15    | 2,55     | 5,67     | 4,8      | 4,14    | 6,21     | 0        | 1,84     | 11,15    | 8,02     | 4,82     | 9,65     | 2,93     | 0        |          |
| hsa-miR-151a-5p   | 14,39    | 15,54    | 10,11    | 29,37    | 16,71    | 59,49    | 9,95     | 10,62    | 10,8     | 37,76    | 54,49    | 5,1      | 32,78    | 25,45   | 12,8     | 26,22    | 9,05     | 12,89    | 38,34    | 7,83     | 22,6     | 29,18    | 31,07    | 5,05     |
| hsa-miR-21-5p     | 1160,34  | 1986,84  | 919,23   | 3971,88  | 1605,48  | 3553,12  | 1246,1   | 2044,6   | 1437,08  | 3134,54  | 5008,51  | 1513,15  | 3164,13  | 1697,03 | 1015,56  | 3346,13  | 837,66   | 895,76   | 3423,9   | 1251,27  | 997,12   | 2223,98  | 1589,88  | 1072,38  |
| hsa-miR-223-3p    | 29,59    | 221,26   | 69,92    | 216,73   | 250,38   | 431,91   | 15,37    | 104,86   | 78,7     | 966,49   | 542,24   | 252,62   | 192,23   | 127,48  | 93,17    | 115,36   | 25,18    | 25,31    | 57,7     | 54,24    | 41,38    | 31,75    | 79,03    | 6,35     |
| hsa-miR-215-5p    | 21,99    | 6,48     | 12,97    | 50,78    | 37,64    | 30,2     | 19,89    | 23,67    | 24,91    | 28,58    | 44,01    | 19,5     | 11,09    | 10,64   | 16,74    | 7,96     | 52,56    | 53,38    | 3,72     | 10,5     | 9,47     | 30,25    | 16,21    | 0,75     |
| hsa-miR-186-5p    | 79,26    | 115,49   | 49,91    | 194,99   | 113,98   | 185,52   | 60,04    | 95,35    | 98,76    | 204,56   | 195,68   | 123,39   | 160,68   | 160,65  | 70,51    | 141,97   | 60,95    | 89,97    | 165,29   | 76,96    | 48,86</  |          |          |          |

|                   |          |           |           |           |           |           |           |           |           |          |           |          |          |           |          |          |           |         |           |           |           |           |           |           |
|-------------------|----------|-----------|-----------|-----------|-----------|-----------|-----------|-----------|-----------|----------|-----------|----------|----------|-----------|----------|----------|-----------|---------|-----------|-----------|-----------|-----------|-----------|-----------|
| hsa-let-7d-3p     | 101,51   | 141,18    | 66,18     | 178,73    | 155,01    | 193,02    | 90,25     | 109,73    | 117,94    | 220,99   | 300,72    | 148,73   | 137,76   | 162,11    | 97,89    | 175,57   | 96,95     | 56,6    | 169,4     | 96,25     | 81,93     | 140,53    | 141,63    | 49,33     |
| hsa-miR-378a-3p   | 57,27    | 126,71    | 69,92     | 113,68    | 83,53     | 115,81    | 196,41    | 124,11    | 59,52     | 137,37   | 96,14     | 105,17   | 161,92   | 131,23    | 64,21    | 67,59    | 53,22     | 63,51   | 96,63     | 93,39     | 83,59     | 68,01     | 131,05    | 92,68     |
| hsa-miR-200c-3p   | 5,43     | 5,4       | 2,64      | 14,6      | 1,9       | 3,86      | 3,07      | 5,09      | 4,63      | 13,44    | 14,93     | 12,58    | 5,67     | 0,83      | 3,35     | 8,55     | 11,7      | 6,9     | 13,11     | 3,63      | 0         | 14,8      | 3,15      | 0         |
| hsa-miR-29c-3p    | 3,8      | 15,97     | 5,94      | 12,45     | 8,88      | 10,67     | 8,14      | 17,48     | 2,87      | 7,89     | 22        | 7,84     | 9,61     | 25,87     | 7,29     | 16,7     | 2,87      | 10,35   | 13,69     | 4,39      | 4,49      | 16,09     | 18,24     | 0         |
| hsa-miR-125b-2-3p | 4,61     | 15,76     | 8,13      | 17,42     | 2,33      | 3,18      | 20,8      | 12,17     | 5,07      | 4,27     | 14,93     | 8,02     | 15,53    | 8,35      | 3,35     | 25,64    | 5,3       | 8,28    | 5,67      | 11,46     | 6,15      | 5,36      | 13,28     | 13,83     |
| hsa-miR-30e-5p    | 249,71   | 392,01    | 173,47    | 469,31    | 329,47    | 616,98    | 381,89    | 338,04    | 283,49    | 479,94   | 610,61    | 403,35   | 483,28   | 501,56    | 276,15   | 376,58   | 212,89    | 289,23  | 459,28    | 226,5     | 281,02    | 388,76    | 443,8     | 309,81    |
| hsa-miR-345-5p    | 14,66    | 57,2      | 30,34     | 55,59     | 29,39     | 55,63     | 7,05      | 31,41     | 24,69     | 97,27    | 81,47     | 50,85    | 35,49    | 57,79     | 32,5     | 43,5     | 23,85     | 20,94   | 30,32     | 11,46     | 31,08     | 14,37     | 24,99     | 7,29      |
| hsa-miR-125a-5p   | 16,01    | 5,83      | 15,39     | 13,61     | 13,75     | 25,66     | 16,82     | 34,51     | 23,81     | 17,49    | 33,53     | 30,07    | 19,72    | 19,82     | 13,98    | 25,25    | 13,91     | 14,96   | 16,63     | 7,45      | 16,45     | 21,67     | 11,48     | 2,8       |
| hsa-miR-10399-3p  | 2,17     | 1,94      | 14,73     | 4,48      | 5,92      | 1,36      | 6,87      | 2,65      | 1,76      | 4,05     | 3,93      | 4,74     | 5,67     | 1,25      | 1,97     | 3,69     | 4,86      | 0       | 6,06      | 1,53      | 14,13     | 2,57      | 3,83      | 7,1       |
| hsa-miR-671-3p    | 7,06     | 9,07      | 9,45      | 6,8       | 8,67      | 37,92     | 6,51      | 1,77      | 11,68     | 28,16    | 9,69      | 2,37     | 9,61     | 6,05      | 11,42    | 9,71     | 7,07      | 0       | 10,56     | 8,21      | 9,47      | 7,94      | 4,95      | 9,72      |
| hsa-miR-103a-3p   | 961,93   | 1989,43   | 1039,94   | 2181,93   | 1105,99   | 1788,03   | 1893,39   | 1356,13   | 1091,86   | 1138,84  | 1901,5    | 996,98   | 1926,23  | 2735,62   | 931,06   | 1904,28  | 923,56    | 1251,48 | 2053,87   | 1091,61   | 1742,47   | 2455,69   | 2104,38   | 2120,28   |
| hsa-miR-25-3p     | 2055,5   | 3849,12   | 2093,5    | 6099,71   | 4009,48   | 4661,5    | 1842,57   | 2214,28   | 2549,44   | 4487,97  | 5176,68   | 3294,22  | 3486,72  | 4609,99   | 2061,45  | 4823,53  | 2161,61   | 1986,17 | 7435,98   | 3429,91   | 1451,48   | 3824,71   | 3914,93   | 1732,36   |
| hsa-miR-584-5p    | 95,27    | 59,58     | 105,53    | 85,13     | 37,01     | 211,87    | 68,91     | 46,02     | 84,87     | 144,84   | 105,83    | 51,22    | 88,97    | 85,33     | 71,89    | 71,86    | 112,41    | 90,2    | 93,5      | 64,36     | 123,64    | 115,43    | 65,97     | 51,76     |
| hsa-miR-223-5p    | 11,67    | 46,63     | 11,21     | 27,05     | 36,8      | 77,21     | 4,16      | 29,2      | 36,37     | 83,4     | 62,61     | 45,57    | 40,42    | 26,5      | 19,5     | 24,08    | 5,08      | 18,64   | 14,08     | 23,49     | 11,3      | 9,65      | 18,91     | 2,43      |
| hsa-miR-1180-3p   | 10,31    | 1,3       | 8,13      | 16,93     | 9,94      | 8,17      | 6,51      | 4,2       | 9,7       | 12,37    | 14,15     | 9,11     | 6,41     | 13,35     | 7,48     | 3,5      | 10,16     | 8,97    | 18,97     | 12,99     | 4,99      | 21,45     | 13,74     | 5,23      |
| hsa-miR-660-5p    | 25,79    | 32,6      | 26,16     | 46,47     | 15,23     | 33,38     | 25,86     | 25,66     | 28,66     | 33,28    | 64,96     | 42,65    | 57,18    | 49,24     | 16,35    | 33,6     | 22,75     | 38,43   | 43,82     | 24,25     | 4,15      | 37,55     | 23,02     | 31,58     |
| hsa-miR-371b-5p   | 0        | 4,96      | 2,42      | 3,98      | 3,81      | 7,27      | 7,6       | 1,55      | 7,05      | 10,03    | 12,84     | 8,38     | 10,35    | 5,22      | 8,08     | 2,72     | 1,1       | 0       | 0         | 0         | 5,15      | 1,07      | 4,5       | 1,31      |
| hsa-miR-194-5p    | 0        | 7,12      | 9,01      | 9,96      | 0         | 6,13      | 8,14      | 1,55      | 3,31      | 2,99     | 11        | 9,11     | 10,6     | 8,55      | 3,94     | 10,1     | 1,99      | 0       | 4,89      | 10,31     | 0         | 6,22      | 7,66      | 3,55      |
| hsa-miR-30e-3p    | 35,56    | 99,95     | 52,33     | 84,3      | 81,42     | 144,65    | 16,28     | 34,73     | 40,34     | 194,32   | 182,84    | 70,54    | 98,09    | 61,34     | 38,41    | 95,55    | 30,26     | 37,74   | 116,97    | 35,52     | 65,81     | 35,83     | 61,02     | 16,63     |
| hsa-miR-340-5p    | 39,63    | 36,91     | 41,77     | 52,77     | 45,68     | 84,7      | 20,26     | 30,53     | 26,89     | 75,08    | 90,9      | 45,2     | 35,98    | 47,57     | 19,7     | 26,02    | 29,15     | 20,02   | 39,9      | 34,18     | 38,39     | 37,12     | 44,13     | 19,43     |
| hsa-miR-532-5p    | 87,67    | 104,48    | 52,33     | 159,31    | 123,5     | 133,3     | 121,72    | 76,32     | 112,65    | 85,54    | 186,77    | 82,2     | 85,76    | 142,91    | 117,79   | 126,24   | 68,68     | 66,5    | 146,7     | 96,44     | 50,69     | 176,36    | 114,83    | 69,7      |
| hsa-miR-10b-5p    | 3099,68  | 2790,94   | 3564,14   | 2911,95   | 2059,93   | 3231,8    | 6371,59   | 5159,73   | 4248,62   | 3324,59  | 4577,86   | 3317,92  | 6930,32  | 3153,72   | 3638,75  | 2824,67  | 2642,38   | 3767,79 | 1540,79   | 2261,14   | 5452,6    | 3756,27   | 2590,06   | 7080,8    |
| hsa-miR-142-5p    | 402,8    | 926,29    | 296,59    | 1230,86   | 706,52    | 914,45    | 496,45    | 653,07    | 539,21    | 1157,19  | 1542,11   | 749,83   | 854,18   | 1076,76   | 500,69   | 1284,35  | 424,24    | 456,05  | 1242,1    | 559,56    | 285,51    | 931,34    | 897,05    | 327,38    |
| hsa-miR-320a-3p   | 1529,75  | 1736      | 1335,21   | 2158,69   | 1367,16   | 2274,66   | 1611,25   | 2610,28   | 1526,58   | 1856,41  | 2358,61   | 1741,89  | 3388,15  | 2052,96   | 1392,75  | 2363,99  | 1696,95   | 1767,12 | 2489,68   | 1516,72   | 884,12    | 2009,72   | 2007,34   | 1375,46   |
| hsa-miR-409-3p    | 83,33    | 31,08     | 31,88     | 14,11     | 15,23     | 158,73    | 42,86     | 13,72     | 19,4      | 95,77    | 12,57     | 10,02    | 55,45    | 30,04     | 34,7     | 44,67    | 41,3      | 36,82   | 127,93    | 12,8      | 36,73     | 12,87     | 50,21     | 14,57     |
| hsa-miR-101-3p    | 393,84   | 552,4     | 406,96    | 968,16    | 566,11    | 638,09    | 689,43    | 361,27    | 447,06    | 482,07   | 762,02    | 453,11   | 526,9    | 838,92    | 333,86   | 612,36   | 443,45    | 435,11  | 842,09    | 468,27    | 603,59    | 959,45    | 648,47    | 646,34    |
| hsa-miR-183-5p    | 29,86    | 62,82     | 76,95     | 55,59     | 91,99     | 79,25     | 89,16     | 38,05     | 60,4      | 44,15    | 48,46     | 68,9     | 37,46    | 88,67     | 35,85    | 68,56    | 76,85     | 86,75   | 78,83     | 100,07    | 73,45     | 72,09     | 104,25    | 94,18     |
| hsa-miR-17a-3p    | 8,69     | 31,95     | 5,94      | 19,91     | 17,55     | 36,56     | 13,75     | 15,71     | 14,11     | 40,95    | 39,03     | 24,97    | 28,83    | 42,35     | 4,73     | 16,12    | 7,29      | 13,35   | 9,19      | 9,36      | 5,65      | 21,88     | 23,42     | 5,23      |
| hsa-miR-4488      | 7,33     | 8,2       | 0         | 8,3       | 17,76     | 3,63      | 2,89      | 15,49     | 39,68     | 13,86    | 3,93      | 4,19     | 15,28    | 20,24     | 3,94     | 8,55     | 12,15     | 18,87   | 2,54      | 14,51     | 9,31      | 10,94     | 12,61     | 2,99      |
| hsa-miR-199a-3p   | 309,15   | 420,72    | 237,67    | 356,3     | 250,59    | 778,66    | 255,91    | 328,08    | 301,35    | 740,6    | 731,11    | 380,02   | 501,03   | 493,84    | 349,02   | 303,56   | 233,43    | 346,75  | 258       | 188,3     | 217,04    | 405,49    | 328,29    | 86,14     |
| hsa-miR-374b-5p   | 4,89     | 6,91      | 8,35      | 9,13      | 8,25      | 17,26     | 2,53      | 2,65      | 1,76      | 17,49    | 8,91      | 4,92     | 7,15     | 8,97      | 0        | 2,14     | 4,2       | 1,84    | 9,19      | 6,3       | 6,32      | 6,22      | 2,03      | 4,86      |
| hsa-miR-142-3p    | 13,3     | 33,89     | 5,28      | 32,19     | 12,69     | 27,25     | 8,86      | 15,71     | 17,19     | 23,89    | 41,39     | 25,33    | 15,53    | 22,12     | 6,11     | 23,31    | 8,39      | 14,73   | 27,78     | 15,28     | 8,64      | 9,01      | 22,07     | 7,1       |
| hsa-miR-3158-3p   | 2,17     | 2,59      | 3,74      | 6,97      | 1,69      | 4,54      | 7,23      | 4,87      | 6,39      | 0        | 3,14      | 2,19     | 4,44     | 13,56     | 5,32     | 5,44     | 7,51      | 3,45    | 10,76     | 8,4       | 4,15      | 9,23      | 6,75      | 10,84     |
| hsa-miR-181a-5p   | 632,42   | 866,49    | 1032,24   | 1362,46   | 838,9     | 1561,63   | 708,42    | 748,42    | 907,57    | 1389,48  | 1661,82   | 863,56   | 1240,36  | 1120,99   | 634,43   | 1567,51  | 572,2     | 553,61  | 2252,8    | 662,3     | 1224,97   | 1305,3    | 681,35    | 765,74    |
| hsa-miR-328-3p    | 30,13    | 48,14     | 58,04     | 79,66     | 41,45     | 88,79     | 21,34     | 41,59     | 50,04     | 140,78   | 123,38    | 51,4     | 73,44    | 75,53     | 45,11    | 74,77    | 20,1      | 31,06   | 69,05     | 19,48     | 0         | 38,4      | 41,66     | 5,98      |
| hsa-miR-381-3p    | 9,77     | 2,37      | 9,23      | 0         | 6,36      | 13,38     | 7,3       | 2,87      | 6,19      | 2,88     | 3,1       | 3,7      | 6,47     | 7,68      | 6,6      | 0,66     | 3,45      | 9,58    | 0         | 4,82      | 1,29      | 9,01      | 6,35      |           |
| hsa-let-7f-5p     | 444,32   | 1440,7    | 835,69    | 1570,56   | 1252,75   | 2807,39   | 550,89    | 695,77    | 854,88    | 1895,44  | 1810,08   | 879,78   | 1335,99  | 1496,74   | 593,07   | 2107,04  | 543,27    | 822,13  | 3184,08   | 927,56    | 749,01    | 1435,53   | 1266,1    | 456,12    |
| hsa-miR-486-5p    | 123775,6 | 136611,62 | 206372,59 | 215087,66 | 160656,68 | 149362,98 | 225160,12 | 108309,15 | 142619,09 | 78055,01 | 113814,39 | 143669,7 | 125526,9 | 160076,98 | 99785,27 | 120038,6 | 210234,02 | 164798  | 151652,31 | 215982,57 | 213610,46 | 176473,92 | 190386,08 | 308624,73 |
| hsa-miR-375-3p    | 58,08    | 75,77     | 75,85     | 175,08    | 37,01     | 50,41     | 97,3      | 52,43     | 65,69     | 36,26    | 252,26    | 79,83    | 49,54    | 44,44     | 39,2     | 68,75    | 92,53     | 121,26  | 18,39     | 82,5      | 25,59     | 165,63    | 44,36     | 31,02     |
| hsa-miR-4466      | 3,26     | 0         | 3,74      | 8,46      | 0         | 5,45      | 6,51      | 5,53      | 11,02     | 4,69     | 5,5       | 5,67     | 2,71     | 1,38      | 0,97     | 8,17     | 2,99      | 0,2     | 8,98      | 0         | 2,57      | 5,18      | 8,78      |           |
| hsa-miR-885-3p    | 8,14     | 19,43     | 13,63     | 20,41     | 10,57     | 8,86      | 107,07    | 32,74     | 12,57     | 1,62     | 25,67     | 10,21    | 29,57    | 28,58     | 3,94     | 19,03    | 30,92     | 8,05    | 0,39      | 21,58     | 20,27     | 15,02     | 36,7      | 24,1      |
| hsa-let-7a-5p     | 1341,65  | 3916,26   | 2006,22   | 4070,62   | 3326,01   | 6080,97   | 1707,83   | 2099,46   | 2274,32   | 4815,39  | 4581,79   | 2389,65  | 3519,5   | 3796,52   | 1660,43  | 5447,35  | 1607,29   | 2389,52 | 7063,35   | 2564,03   | 1613,34   | 3649,86   | 3254,07   | 1287,08   |
| hsa-miR-7706      | 4,07     | 8,2       | 4,18      | 5,97      | 2,33      | 7,49      | 0         | 2,88      | 6,61      | 4,69     | 1,05      | 4,74     | 1,48     | 13,77     | 4,92     | 5,44     | 10,38     | 1,38    | 9         | 4,2       | 4,99      | 6,01      | 13,06     | 6,17      |
| hsa-miR-7704      | 55,1     | 29,14     | 24,62     | 32,86     | 55,62     | 34,52     | 62,03     | 28,32     | 100,52    | 57,59    | 108,19    | 63,97    | 60,38    | 51,95     | 46,48    | 86,23    | 11,04     | 6,67    | 173,31    | 57,29     | 21,27     | 74,02     | 27,7      | 11,4      |
| hsa-miR-486-3p    | 139,24   | 176,8     | 101,58    | 254,24    | 172,35    | 161,45    | 152,64    | 122,78    | 124,33    | 80,63    | 165,82    | 199,58   | 104      | 239,93    | 154,42   | 158,09   | 151,72    | 168,2   | 285,98    | 152,02    | 16,29     | 223,99    | 221,56    | 79,79     |
| hsa-miR-370-3p    | 15,47    | 11,44     | 15,61     | 4,15      | 4,02      | 40,65     | 18,99     | 3,76      | 3,97      | 21,97    | 7,6       | 2,92     | 13,31    | 11,89     | 9,06     | 25,05    | 12,81     | 12,89   | 14,47     | 6,88      | 24,1      | 3,86      | 20,26     | 1,68      |
| hsa-miR-4732-5p   | 14,39    | 6,91      | 4,84      | 9,13      | 13,11     | 4,54      | 12,84     | 4,65      | 3,53      | 7,89     | 4,72      | 4,37     | 10,35    | 10,43     | 5,91     | 5,05     | 5,52      | 12,43   | 8,22      | 10,5      | 4,49      | 13,52     |           |           |

| Supplement Table 2                |                                           | mir-486-5p |         |                                         |         |                                           |         |
|-----------------------------------|-------------------------------------------|------------|---------|-----------------------------------------|---------|-------------------------------------------|---------|
| Parameter                         | Timepoint                                 | Baseline   |         | 1 hour after exposure to weightlessness |         | 24 hours after exposure to weightlessness |         |
|                                   |                                           | r          | p-value | r                                       | p-value | r                                         | p-value |
| age (years)                       | Baseline                                  | 0,036      | 0,933   | 0,539                                   | 0,168   | 0,407                                     | 0,317   |
| weight (kg)                       | Baseline                                  | 0,238      | 0,570   | -0,381                                  | 0,352   | -0,095                                    | 0,823   |
| height (cm)                       | Baseline                                  | 0,143      | 0,736   | -0,643                                  | 0,086   | -0,286                                    | 0,493   |
| Creatinin (µmol/l)                | Baseline                                  | -0,214     | 0,610   | -0,619                                  | 0,102   | -0,095                                    | 0,823   |
|                                   | 1 hour after exposure to weightlessness   | -0,651     | 0,081   | -0,470                                  | 0,240   | 0,120                                     | 0,776   |
|                                   | 24 hours after exposure to weightlessness | -0,238     | 0,570   | -0,690                                  | 0,058   | 0,119                                     | 0,779   |
| GFR (ml/min/1,73 m <sup>2</sup> ) | Baseline                                  | 0,262      | 0,531   | -0,071                                  | 0,867   | -0,310                                    | 0,456   |
|                                   | 1 hour after exposure to weightlessness   | 0,452      | 0,260   | -0,095                                  | 0,823   | -0,238                                    | 0,570   |
|                                   | 24 hours after exposure to weightlessness | 0,119      | 0,779   | -0,167                                  | 0,693   | -0,476                                    | 0,233   |
| CRP (mg/l)                        | Baseline                                  | 0,393      | 0,336   | -0,160                                  | 0,706   | -0,393                                    | 0,336   |
|                                   | 1 hour after exposure to weightlessness   | 0,123      | 0,772   | -0,049                                  | 0,908   | -0,196                                    | 0,641   |
|                                   | 24 hours after exposure to weightlessness | 0,140      | 0,740   | 0,077                                   | 0,857   | -0,077                                    | 0,857   |
| BNP (pg/ml)                       | Baseline                                  | 0,114      | 0,788   | 0,355                                   | 0,388   | 0,038                                     | 0,929   |
|                                   | 1 hour after exposure to weightlessness   | 0,243      | 0,563   | -0,115                                  | 0,786   | -0,383                                    | 0,349   |
|                                   | 24 hours after exposure to weightlessness | -0,171     | 0,685   | -0,016                                  | 0,971   | -0,203                                    | 0,630   |
| CK (U/l)                          | Baseline                                  | -0,071     | 0,867   | -0,667                                  | 0,071   | 0,024                                     | 0,955   |
|                                   | 1 hour after exposure to weightlessness   | -0,071     | 0,867   | -0,667                                  | 0,071   | 0,024                                     | 0,955   |
|                                   | 24 hours after exposure to weightlessness | -0,143     | 0,736   | -,833 <sup>†</sup>                      | 0,010   | 0,048                                     | 0,911   |
| Myoglobin (µg/l)                  | Baseline                                  | -0,323     | 0,435   | -0,635                                  | 0,091   | 0,132                                     | 0,756   |
|                                   | 1 hour after exposure to weightlessness   | -0,405     | 0,320   | -,714 <sup>†</sup>                      | 0,047   | 0,119                                     | 0,779   |
|                                   | 24 hours after exposure to weightlessness | 0,048      | 0,911   | -,714 <sup>†</sup>                      | 0,047   | 0,381                                     | 0,352   |

\* p<0.05    \*\* p<0.01



| Supplement Table 3                |                                           | mir-24-3p |         |                                         |         |                                           |         |
|-----------------------------------|-------------------------------------------|-----------|---------|-----------------------------------------|---------|-------------------------------------------|---------|
| Parameter                         | Timepoint                                 | Baseline  |         | 1 hour after exposure to weightlessness |         | 24 hours after exposure to weightlessness |         |
|                                   |                                           | r         | p-value | r                                       | p-value | r                                         | p-value |
| age (years)                       | Baseline                                  | 0,455     | 0,257   | -0,707                                  | 0,050   | -0,132                                    | 0,756   |
| weight (kg)                       | Baseline                                  | 0,286     | 0,493   | -0,310                                  | 0,456   | -0,238                                    | 0,570   |
| height (cm)                       | Baseline                                  | 0,119     | 0,779   | -0,024                                  | 0,955   | 0,024                                     | 0,955   |
| Creatinin (µmol/l)                | Baseline                                  | 0,262     | 0,531   | 0,024                                   | 0,955   | 0,143                                     | 0,736   |
|                                   | 1 hour after exposure to weightlessness   | 0,627     | 0,096   | -0,410                                  | 0,313   | -0,048                                    | 0,910   |
|                                   | 24 hours after exposure to weightlessness | 0,571     | 0,139   | -0,310                                  | 0,456   | -0,357                                    | 0,385   |
| GFR (ml/min/1,73 m <sup>2</sup> ) | Baseline                                  | -0,381    | 0,352   | 0,238                                   | 0,570   | 0,048                                     | 0,911   |
|                                   | 1 hour after exposure to weightlessness   | -0,667    | 0,071   | 0,524                                   | 0,183   | -0,024                                    | 0,955   |
|                                   | 24 hours after exposure to weightlessness | -0,548    | 0,160   | 0,429                                   | 0,289   | 0,333                                     | 0,420   |
| CRP (mg/l)                        | Baseline                                  | 0,282     | 0,498   | -0,049                                  | 0,908   | 0,160                                     | 0,706   |
|                                   | 1 hour after exposure to weightlessness   | 0,417     | 0,304   | -0,123                                  | 0,772   | 0,196                                     | 0,641   |
|                                   | 24 hours after exposure to weightlessness | 0,319     | 0,441   | -0,089                                  | 0,833   | 0,128                                     | 0,763   |
| BNP (pg/ml)                       | Baseline                                  | -0,076    | 0,858   | 0,127                                   | 0,765   | -0,076                                    | 0,858   |
|                                   | 1 hour after exposure to weightlessness   | 0,128     | 0,763   | -0,077                                  | 0,857   | -0,243                                    | 0,563   |
|                                   | 24 hours after exposure to weightlessness | 0,514     | 0,192   | -0,234                                  | 0,577   | -0,078                                    | 0,854   |
| CK (U/l)                          | Baseline                                  | 0,619     | 0,102   | -0,452                                  | 0,260   | -0,667                                    | 0,071   |
|                                   | 1 hour after exposure to weightlessness   | 0,619     | 0,102   | -0,452                                  | 0,260   | -0,667                                    | 0,071   |
|                                   | 24 hours after exposure to weightlessness | 0,500     | 0,207   | -0,238                                  | 0,570   | -0,595                                    | 0,120   |
| Myoglobin (µg/l)                  | Baseline                                  | 0,743*    | 0,035   | -0,192                                  | 0,649   | -0,311                                    | 0,453   |
|                                   | 1 hour after exposure to weightlessness   | 0,619     | 0,102   | -0,048                                  | 0,911   | -0,238                                    | 0,570   |
|                                   | 24 hours after exposure to weightlessness | 0,310     | 0,456   | 0,071                                   | 0,867   | -0,643                                    | 0,086   |

\* p<0.05    \*\* p<0.01

| Supplement Table 4                |                                           | mir-223-3p        |         |                                         |         |                                           |         |
|-----------------------------------|-------------------------------------------|-------------------|---------|-----------------------------------------|---------|-------------------------------------------|---------|
| Parameter                         | Timepoint                                 | Baseline          |         | 1 hour after exposure to weightlessness |         | 24 hours after exposure to weightlessness |         |
|                                   |                                           | r                 | p-value | r                                       | p-value | r                                         | p-value |
| age (years)                       | Baseline                                  | -0,455            | 0,257   | -,755 <sup>†</sup>                      | 0,031   | -0,180                                    | 0,670   |
| weight (kg)                       | Baseline                                  | -0,429            | 0,289   | 0,143                                   | 0,736   | -0,381                                    | 0,352   |
| height (cm)                       | Baseline                                  | -0,429            | 0,289   | 0,238                                   | 0,570   | -0,476                                    | 0,233   |
| Creatinin (µmol/l)                | Baseline                                  | -0,238            | 0,570   | 0,071                                   | 0,867   | -0,619                                    | 0,102   |
|                                   | 1 hour after exposure to weightlessness   | 0,096             | 0,820   | -0,217                                  | 0,606   | -,952 <sup>**</sup>                       | 0,000   |
|                                   | 24 hours after exposure to weightlessness | -0,024            | 0,955   | 0,167                                   | 0,693   | -,738 <sup>†</sup>                        | 0,037   |
| GFR (ml/min/1,73 m <sup>2</sup> ) | Baseline                                  | -0,119            | 0,779   | 0,476                                   | 0,233   | 0,214                                     | 0,610   |
|                                   | 1 hour after exposure to weightlessness   | -0,143            | 0,736   | ,738 <sup>†</sup>                       | 0,037   | 0,524                                     | 0,183   |
|                                   | 24 hours after exposure to weightlessness | -0,143            | 0,736   | 0,500                                   | 0,207   | 0,119                                     | 0,779   |
| CRP (mg/l)                        | Baseline                                  | -0,123            | 0,772   | -0,221                                  | 0,599   | 0,037                                     | 0,931   |
|                                   | 1 hour after exposure to weightlessness   | -0,025            | 0,954   | -0,393                                  | 0,336   | -0,086                                    | 0,840   |
|                                   | 24 hours after exposure to weightlessness | 0,026             | 0,952   | -0,396                                  | 0,332   | 0,064                                     | 0,881   |
| BNP (pg/ml)                       | Baseline                                  | 0,495             | 0,213   | -0,101                                  | 0,811   | 0,545                                     | 0,162   |
|                                   | 1 hour after exposure to weightlessness   | 0,587             | 0,126   | 0,064                                   | 0,881   | 0,230                                     | 0,584   |
|                                   | 24 hours after exposure to weightlessness | ,733 <sup>†</sup> | 0,039   | -0,312                                  | 0,452   | -0,062                                    | 0,883   |
| CK (U/l)                          | Baseline                                  | 0,405             | 0,320   | 0,095                                   | 0,823   | -0,524                                    | 0,183   |
|                                   | 1 hour after exposure to weightlessness   | 0,405             | 0,320   | 0,095                                   | 0,823   | -0,524                                    | 0,183   |
|                                   | 24 hours after exposure to weightlessness | 0,333             | 0,420   | 0,333                                   | 0,420   | -0,571                                    | 0,139   |
| Myoglobin (µg/l)                  | Baseline                                  | 0,443             | 0,272   | -0,024                                  | 0,955   | -0,551                                    | 0,157   |
|                                   | 1 hour after exposure to weightlessness   | 0,452             | 0,260   | 0,095                                   | 0,823   | -0,571                                    | 0,139   |
|                                   | 24 hours after exposure to weightlessness | 0,095             | 0,823   | 0,571                                   | 0,139   | -0,214                                    | 0,610   |

\* p<0.05    \*\* p<0.01

| Supplement Table 5                |                                           | mir-941  |         |                                         |         |                                           |         |
|-----------------------------------|-------------------------------------------|----------|---------|-----------------------------------------|---------|-------------------------------------------|---------|
| Parameter                         | Timepoint                                 | Baseline |         | 1 hour after exposure to weightlessness |         | 24 hours after exposure to weightlessness |         |
|                                   |                                           | r        | p-value | r                                       | p-value | r                                         | p-value |
| age (years)                       | Baseline                                  | -0,347   | 0,399   | -0,443                                  | 0,272   | 0,299                                     | 0,471   |
| weight (kg)                       | Baseline                                  | 0,262    | 0,531   | -0,095                                  | 0,823   | -0,214                                    | 0,610   |
| height (cm)                       | Baseline                                  | 0,286    | 0,493   | -0,167                                  | 0,693   | -0,310                                    | 0,456   |
| Creatinin (µmol/l)                | Baseline                                  | 0,071    | 0,867   | -0,214                                  | 0,610   | -0,262                                    | 0,531   |
|                                   | 1 hour after exposure to weightlessness   | 0,048    | 0,910   | -0,265                                  | 0,526   | -0,410                                    | 0,313   |
|                                   | 24 hours after exposure to weightlessness | 0,143    | 0,736   | -0,214                                  | 0,610   | -0,214                                    | 0,610   |
| GFR (ml/min/1,73 m <sup>2</sup> ) | Baseline                                  | 0,310    | 0,456   | 0,571                                   | 0,139   | -0,333                                    | 0,420   |
|                                   | 1 hour after exposure to weightlessness   | 0,143    | 0,736   | 0,690                                   | 0,058   | -0,048                                    | 0,911   |
|                                   | 24 hours after exposure to weightlessness | 0,333    | 0,420   | 0,643                                   | 0,086   | -0,524                                    | 0,183   |
| CRP (mg/l)                        | Baseline                                  | 0,442    | 0,273   | -0,589                                  | 0,124   | -0,049                                    | 0,908   |
|                                   | 1 hour after exposure to weightlessness   | 0,258    | 0,538   | -0,577                                  | 0,134   | -0,025                                    | 0,954   |
|                                   | 24 hours after exposure to weightlessness | 0,102    | 0,810   | -0,562                                  | 0,147   | 0,166                                     | 0,694   |
| BNP (pg/ml)                       | Baseline                                  | 0,000    | 1,000   | -0,114                                  | 0,788   | 0,330                                     | 0,425   |
|                                   | 1 hour after exposure to weightlessness   | 0,600    | 0,116   | -0,358                                  | 0,385   | -0,077                                    | 0,857   |
|                                   | 24 hours after exposure to weightlessness | 0,483    | 0,225   | -0,483                                  | 0,225   | -0,171                                    | 0,685   |
| CK (U/l)                          | Baseline                                  | 0,333    | 0,420   | -0,667                                  | 0,071   | 0,024                                     | 0,955   |
|                                   | 1 hour after exposure to weightlessness   | 0,333    | 0,420   | -0,667                                  | 0,071   | 0,024                                     | 0,955   |
|                                   | 24 hours after exposure to weightlessness | 0,262    | 0,531   | -0,405                                  | 0,320   | -0,048                                    | 0,911   |
| Myoglobin (µg/l)                  | Baseline                                  | 0,168    | 0,691   | -0,563                                  | 0,146   | 0,000                                     | 1,000   |
|                                   | 1 hour after exposure to weightlessness   | 0,119    | 0,779   | -0,429                                  | 0,289   | -0,048                                    | 0,911   |
|                                   | 24 hours after exposure to weightlessness | -0,143   | 0,736   | -0,071                                  | 0,867   | 0,357                                     | 0,385   |

\* p<0.05    \*\* p<0.01

## Supplement Table 6

### Hypergeometric Test

| Name                       | Hits | Pval      |
|----------------------------|------|-----------|
| p53 signaling pathway      | 23   | 1,19E-08  |
| Cell cycle                 | 28   | 0,0000016 |
| HTLV-I infection           | 33   | 0,000133  |
| Pathways in cancer         | 42   | 0,000691  |
| Bladder cancer             | 10   | 0,000691  |
| Prostate cancer            | 18   | 0,000804  |
| Chronic myeloid leukemia   | 16   | 0,000933  |
| Small cell lung cancer     | 16   | 0,00266   |
| Glioma                     | 14   | 0,0028    |
| Melanoma                   | 13   | 0,0145    |
| Non-small cell lung cancer | 11   | 0,0145    |
| Pancreatic cancer          | 13   | 0,0145    |
| Legionellosis              | 9    | 0,0234    |

### Empirical sampling

| Name                                                       | Hits | Pval    |
|------------------------------------------------------------|------|---------|
| Thiamine metabolism                                        | 1    | < 0,001 |
| Vitamin B6 metabolism                                      | 2    | < 0,001 |
| Lipoic acid metabolism                                     | 1    | < 0,001 |
| Sulfur relay system                                        | 2    | < 0,001 |
| Cytosolic DNA-sensing pathway                              | 3    | < 0,001 |
| Asthma                                                     | 1    | < 0,001 |
| Glycosaminoglycan degradation                              | 4    | 0,001   |
| Lysosome                                                   | 3    | 0,001   |
| Maturity onset diabetes of the young                       | 3    | 0,001   |
| p53 signaling pathway                                      | 23   | 0,003   |
| NOD-like receptor signaling pathway                        | 9    | 0,004   |
| Aldosterone-regulated sodium reabsorption                  | 6    | 0,005   |
| Legionellosis                                              | 9    | 0,005   |
| Propanoate metabolism                                      | 3    | 0,007   |
| Amyotrophic lateral sclerosis (ALS)                        | 6    | 0,007   |
| Bladder cancer                                             | 10   | 0,008   |
| Toll-like receptor signaling pathway                       | 13   | 0,01    |
| Intestinal immune network for IgA production               | 3    | 0,01    |
| Small cell lung cancer                                     | 16   | 0,01    |
| Glycerophospholipid metabolism                             | 8    | 0,011   |
| Nicotinate and nicotinamide metabolism                     | 3    | 0,011   |
| Tight junction                                             | 14   | 0,011   |
| HTLV-I infection                                           | 33   | 0,011   |
| Steroid biosynthesis                                       | 3    | 0,012   |
| Cytokine-cytokine receptor interaction                     | 20   | 0,012   |
| Apoptosis                                                  | 12   | 0,014   |
| Leishmaniasis                                              | 7    | 0,014   |
| Non-small cell lung cancer                                 | 11   | 0,014   |
| Staphylococcus aureus infection                            | 3    | 0,015   |
| MAPK signaling pathway                                     | 30   | 0,016   |
| African trypanosomiasis                                    | 3    | 0,016   |
| Prostate cancer                                            | 18   | 0,016   |
| Melanoma                                                   | 13   | 0,016   |
| Cell cycle                                                 | 28   | 0,017   |
| Adipocytokine signaling pathway                            | 7    | 0,017   |
| Proximal tubule bicarbonate reclamation                    | 1    | 0,017   |
| Chronic myeloid leukemia                                   | 16   | 0,017   |
| Glutathione metabolism                                     | 3    | 0,018   |
| Notch signaling pathway                                    | 5    | 0,018   |
| alpha-Linolenic acid metabolism                            | 2    | 0,019   |
| Terpenoid backbone biosynthesis                            | 2    | 0,019   |
| Epithelial cell signaling in Helicobacter pylori infection | 5    | 0,019   |
| Toxoplasmosis                                              | 13   | 0,019   |
| Epstein-Barr virus infection                               | 14   | 0,019   |
| Purine metabolism                                          | 16   | 0,02    |
| Fat digestion and absorption                               | 1    | 0,02    |
| Glioma                                                     | 14   | 0,02    |
| Acute myeloid leukemia                                     | 9    | 0,02    |
| Glycerolipid metabolism                                    | 5    | 0,023   |
| PPAR signaling pathway                                     | 7    | 0,026   |
| Pancreatic cancer                                          | 13   | 0,026   |
| beta-Alanine metabolism                                    | 2    | 0,027   |
| Riboflavin metabolism                                      | 1    | 0,028   |
| Folate biosynthesis                                        | 1    | 0,028   |
| Malaria                                                    | 1    | 0,029   |
| Tuberculosis                                               | 14   | 0,029   |
| Pathways in cancer                                         | 42   | 0,029   |
| Autoimmune thyroid disease                                 | 1    | 0,029   |
| Fatty acid biosynthesis                                    | 1    | 0,03    |
| Bile secretion                                             | 2    | 0,03    |
| Glycosphingolipid biosynthesis - ganglio series            | 1    | 0,031   |
| Ribosome biogenesis in eukaryotes                          | 5    | 0,031   |
| Shigellosis                                                | 6    | 0,031   |
| Pyruvate metabolism                                        | 4    | 0,032   |
| Transcriptional misregulation in cancer                    | 2    | 0,032   |
| Osteoclast differentiation                                 | 12   | 0,033   |
| Chagas disease (American trypanosomiasis)                  | 10   | 0,033   |
| Measles                                                    | 12   | 0,033   |
| Phenylalanine metabolism                                   | 1    | 0,036   |
| Salmonella infection                                       | 8    | 0,036   |
| Oocyte meiosis                                             | 12   | 0,037   |
| Pyrimidine metabolism                                      | 11   | 0,038   |
| Vibrio cholerae infection                                  | 3    | 0,039   |
| Antigen processing and presentation                        | 3    | 0,041   |
| Endocytosis                                                | 11   | 0,042   |
| TGF-beta signaling pathway                                 | 11   | 0,042   |
| VEGF signaling pathway                                     | 7    | 0,042   |
| Arginine and proline metabolism                            | 4    | 0,045   |
| Amoebiasis                                                 | 3    | 0,045   |
| Influenza A                                                | 11   | 0,045   |
| Systemic lupus erythematosus                               | 1    | 0,047   |
| Selenocompound metabolism                                  | 1    | 0,048   |
| Chemokine signaling pathway                                | 15   | 0,048   |
| Circadian rhythm - mammal                                  | 3    | 0,048   |
| Cell adhesion molecules (CAMs)                             | 7    | 0,049   |

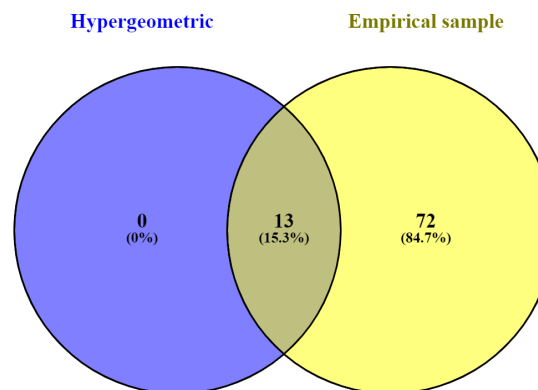

**Supplement Table 7a**

| p53 signalling pathway | hsa-miR-223-3p | hsa-miR-24-3p | hsa-miR-486-5p | hsa-miR-941 | total |
|------------------------|----------------|---------------|----------------|-------------|-------|
| APAF1                  | 0              | 1             | 0              | 0           | 1     |
| CCND1                  | 0              | 1             | 0              | 0           | 1     |
| CCNB1                  | 0              | 1             | 0              | 0           | 1     |
| CCNG1                  | 0              | 1             | 0              | 0           | 1     |
| CDK1                   | 0              | 1             | 0              | 0           | 1     |
| CDK4                   | 0              | 1             | 1              | 0           | 2     |
| CDKN2A                 | 0              | 1             | 0              | 0           | 1     |
| CHEK1                  | 0              | 1             | 0              | 0           | 1     |
| IGF1                   | 0              | 1             | 0              | 0           | 1     |
| MDM4                   | 0              | 1             | 0              | 0           | 1     |
| RRM2                   | 0              | 1             | 0              | 0           | 1     |
| TP53                   | 1              | 1             | 0              | 0           | 2     |
| PPM1D                  | 0              | 1             | 0              | 0           | 1     |
| BBC3                   | 0              | 1             | 0              | 0           | 1     |
| SESN1                  | 0              | 1             | 0              | 0           | 1     |
| STEAP3                 | 0              | 1             | 0              | 0           | 1     |
| RFWD2                  | 0              | 1             | 0              | 0           | 1     |
| ATM                    | 1              | 0             | 0              | 0           | 1     |
| CDK2                   | 1              | 0             | 0              | 0           | 1     |
| MDM2                   | 1              | 0             | 0              | 0           | 1     |
| SESN3                  | 1              | 0             | 0              | 0           | 1     |
| SERPINE1               | 0              | 0             | 1              | 0           | 1     |
| PTEN                   | 0              | 0             | 1              | 0           | 1     |
| <b>Sum</b>             | <b>5</b>       | <b>17</b>     | <b>3</b>       | <b>0</b>    |       |

**Supplement Table 7b**

| Cell cycle | hsa-miR-223-3p | hsa-miR-24-3p | hsa-miR-486-5p | hsa-miR-941 | total |
|------------|----------------|---------------|----------------|-------------|-------|
| CCND1      | 0              | 1             | 0              | 0           | 1     |
| CCNA2      | 0              | 1             | 0              | 0           | 1     |
| CCNB1      | 0              | 1             | 0              | 0           | 1     |
| CDK1       | 0              | 1             | 0              | 0           | 1     |
| CDK4       | 0              | 1             | 1              | 0           | 2     |
| CDKN1B     | 0              | 1             | 0              | 0           | 1     |
| CDKN2A     | 0              | 1             | 0              | 0           | 1     |
| CHEK1      | 0              | 1             | 0              | 0           | 1     |
| E2F1       | 1              | 1             | 0              | 0           | 2     |
| E2F2       | 0              | 1             | 0              | 0           | 1     |
| E2F3       | 0              | 1             | 0              | 0           | 1     |
| HDAC1      | 0              | 1             | 0              | 0           | 1     |
| MCM4       | 0              | 1             | 0              | 0           | 1     |
| MYC        | 0              | 1             | 0              | 0           | 1     |
| PCNA       | 0              | 1             | 0              | 0           | 1     |
| RBL1       | 0              | 1             | 0              | 0           | 1     |
| TFDP2      | 0              | 1             | 0              | 0           | 1     |
| TGFB1      | 0              | 1             | 0              | 0           | 1     |
| TP53       | 1              | 1             | 0              | 0           | 2     |
| YWHAZ      | 0              | 1             | 0              | 0           | 1     |
| PKMYT1     | 0              | 1             | 0              | 0           | 1     |
| DBF4       | 0              | 1             | 0              | 0           | 1     |
| ATM        | 1              | 0             | 0              | 0           | 1     |
| CDC27      | 1              | 0             | 0              | 0           | 1     |
| CDK2       | 1              | 0             | 0              | 0           | 1     |
| MDM2       | 1              | 0             | 0              | 0           | 1     |
| SMAD2      | 0              | 0             | 1              | 0           | 1     |
| CDC20      | 0              | 0             | 0              | 1           | 1     |
| <b>Sum</b> | <b>6</b>       | <b>22</b>     | <b>2</b>       | <b>1</b>    |       |
